# Supplementary material
Source: publisher figshare collection journal article supplement (https://acs.figshare.com/ndownloader/files/14545922)
Supplement: Supplementary file 1 [file 14545922]

## Sheet: Table S2A
	Table S2A. Full peak list of datasets analyzed at 0.1 mg/mL following MZMine processing and preliminary filtering completed in Excel (as listed in Materials and Methods). This peak list was imported into Sirius for additional data filtering (via hierarchical clustering analysis), data transformation, model simplification, and production of selectivity ratio models
	* samples are listed in column A, each analyzed in triplicate. m/z values and retention times are listed in each column of row 4, combined as "m/z / RT." Peak areas of each feature found in each sample are listed rows.
m/z / RT	200.078/5.402	201.055/4.785	201.055/5.432	201.091/5.424	201.112/3.195	201.114/3.194	202.026/3.527	203.029/3.506	203.033/5.34	203.07/3.953	203.07/4.605	203.071/2.758	203.129/3.637	204.073/2.759	204.073/3.943	204.073/4.604	205.051/2.735	205.075/4.606	207.065/2.603	207.065/3.733	209.079/2.745	209.08/2.746	211.075/5.427	212.075/1.646	212.075/5.84	213.054/4.801	215.07/4.799	215.094/3.837	215.129/3.613	217.014/3.816	217.049/3.784	217.05/3.519	217.085/5.411	218.016/3.815	218.053/3.514	218.09/5.391	219.029/2.839	219.029/3.48	219.031/2.84	219.055/3.504	221.155/6.09	225.112/2.744	225.112/3.389	225.114/3.389	225.128/3.42	227.071/3.266	228.074/5.419	229.085/5.429	229.086/3.123
3-1_1	604.607	2590.77	0	0	5.91204e+06	5.93468e+06	57306.4	3402.37	6619.46	1.40284e+06	1.00875e+06	2.0792e+08	1.84319e+06	8.16445e+06	47861.5	101361	1.28202e+06	0	1.0825e+07	5876.4	3.40981e+06	3.56044e+06	636.063	3.27618e+08	8.35427e+07	0	0	3.71728e+08	4.50048e+06	48354.6	836375	2.16623e+06	331924	0	221729	7334.67	3.76872e+06	82699.6	3.37945e+06	2509.18	2.30887e+07	3.15994e+06	2.20335e+06	2.31527e+06	31262.3	2.16257e+06	44184.3	372265	1.95875e+07
3-1_2	463.834	2151.51	0	0	6.18479e+06	6.50457e+06	19816.4	6813.1	3844.92	949212	866758	1.87472e+08	1.66668e+06	7.73918e+06	107849	59038.7	1.21981e+06	0	1.07197e+07	3789.08	3.62375e+06	3.46296e+06	0	3.38411e+08	8.45105e+07	0	0	2.23443e+08	4.36076e+06	14033.5	529836	723629	192460	0	21284.2	3890.29	3.45138e+06	96354.5	3.13592e+06	3599.75	2.12548e+07	2.79947e+06	2.07444e+06	2.14324e+06	21755.8	2.05682e+06	24718.2	122695	1.92015e+07
3-1_3	446.077	2284.91	0	0	5.65748e+06	5.67564e+06	7804.92	5947.29	5848.79	1.50637e+06	666837	1.86296e+08	1.60837e+06	7.86398e+06	57525.5	75100.1	1.1224e+06	0	1.06472e+07	0	3.25577e+06	3.42e+06	1650.71	3.41107e+08	8.62599e+07	0	0	3.19448e+08	4.21199e+06	2586.31	260319	647645	350582	0	12335.8	9193.03	2.969e+06	77960.2	2.68179e+06	2641.9	2.18218e+07	2.68542e+06	1.92917e+06	1.99165e+06	24295.8	1.87705e+06	19402.6	136556	1.95503e+07
3-2_1	1.37839e+07	1.60046e+07	1.07162e+07	7.89034e+06	3.83791e+06	5.04874e+06	1.64991e+08	1.23887e+07	1.63077e+07	4.47538e+07	5.41204e+09	1.36461e+07	442437	1.73384e+06	3.11006e+06	6.84755e+08	44655.9	3.55754e+07	31139.6	6.22589e+06	1.51361e+06	1.64387e+06	6.86331e+06	2.10622e+08	3.44566e+08	2.65118e+07	6.11327e+07	1.38394e+08	3.57967e+06	3.86786e+07	1.74579e+08	9.15525e+08	2.76993e+08	5.11023e+06	1.54627e+08	1.1885e+07	653657	631153	611384	1.17425e+07	2.52779e+07	305414	127259	131711	2.06685e+06	42716.8	4.17069e+08	2.31224e+08	1.29186e+06
3-2_2	1.29484e+07	1.50976e+07	9.00778e+06	7.73867e+06	4.70641e+06	4.14315e+06	1.55768e+08	1.20979e+07	1.59208e+07	2.70315e+07	5.34964e+09	1.32978e+07	431528	1.63808e+06	3.28595e+06	6.74199e+08	27464	3.46781e+07	24221.4	6.31458e+06	1.51025e+06	1.65034e+06	6.84893e+06	2.1044e+08	3.43865e+08	2.77524e+07	5.86648e+07	2.24513e+08	3.78812e+06	3.83213e+07	2.16887e+08	9.33407e+08	3.20793e+08	5.13056e+06	1.60373e+08	1.62486e+07	536920	457275	517916	1.18742e+07	2.09906e+07	231847	110204	111550	1.92685e+06	33759.9	4.18977e+08	2.15548e+08	1.47176e+06
3-2_3	1.34957e+07	1.71506e+07	1.22149e+07	8.0432e+06	4.27392e+06	4.64203e+06	1.63524e+08	1.27427e+07	1.74224e+07	2.59678e+07	5.52427e+09	1.3704e+07	291323	1.68928e+06	3.28546e+06	6.95937e+08	27463.9	3.49579e+07	34525	6.40786e+06	1.42286e+06	1.59501e+06	6.95454e+06	2.13561e+08	3.46545e+08	2.70039e+07	1.00791e+08	1.61236e+08	4.06925e+06	4.41416e+07	1.72233e+08	6.07082e+08	3.24157e+08	5.26851e+06	1.64497e+08	1.23767e+07	541325	514967	520346	1.24389e+07	2.1216e+07	273615	94807.8	182858	1.7566e+06	25865.9	4.37458e+08	4.84303e+08	1.38536e+06
3-3_1	89807.1	67914.1	83624	84664.3	4.35093e+06	4.85199e+06	584339	39140.3	404094	530515	3.50818e+07	2.66232e+06	679887	317370	34414.7	5.33891e+06	3970.58	372400	6798.98	27565.8	1.79382e+06	1.97333e+06	65535.2	2.91861e+08	8.83919e+07	187167	340856	3.40815e+08	3.97453e+06	181028	1.70738e+06	6.19708e+06	1.28066e+06	12592	852951	143135	329144	37655.5	320971	59639.3	1.94592e+07	503740	581037	624128	183202	10369.9	1.41927e+06	6.45055e+06	287500
3-3_2	11470.5	36540.2	9555.73	5549.85	4.48576e+06	4.9884e+06	229568	7192.69	135369	456264	2.83557e+07	2.60184e+06	690087	306434	21524.1	3.53332e+06	5010.48	233224	6479.66	8080.49	2.08576e+06	2.33387e+06	6456.84	2.88361e+08	8.39906e+07	106840	139302	1.13928e+08	3.54826e+06	54578.7	703453	2.57727e+06	424508	0	330062	30909.5	398510	22570.4	388231	26394.1	1.94938e+07	574610	709921	747047	210943	7986.59	481384	2.05706e+06	289933
3-3_3	7950.72	61556.3	11495.7	13540.1	4.58147e+06	4.54752e+06	171996	1357.05	88368.3	425164	2.11355e+07	2.565e+06	718449	313483	10173.4	3.3247e+06	6535.25	230772	2364.04	6856.69	1.88629e+06	2.10788e+06	7244.23	1.80756e+08	3.19012e+07	113017	116459	2.32639e+08	4.05552e+06	25984	679512	2.06887e+06	569614	0	262406	30269.3	396427	20902.1	382443	25391.6	1.97859e+07	521290	799443	813233	213851	9003.57	382229	1.4266e+06	265294
5-1_1	554.613	0	0	0	4.18631e+06	5.60714e+06	165170	0	2787.34	9975.34	290930	63176.1	123859	0	593.826	25588.5	2243.99	0	3167.47	3758.02	1.33968e+06	1.51561e+06	0	3.42157e+08	8.96594e+07	0	0	2.3158e+08	4.06126e+06	40665.2	616680	1.88902e+06	356413	0	197569	5154.28	21610.9	11978.2	19564.7	5786.2	2.07372e+07	397629	190050	201926	508.82	8872.5	13521	113071	0
5-1_2	674.032	0	0	0	4.72733e+06	5.23641e+06	25757.9	0	0	4198.68	274340	118053	120083	3053.15	2229.75	11011.4	1452.16	0	3298.09	4024.72	1.39422e+06	1.59816e+06	0	3.43176e+08	8.06809e+07	0	0	2.6474e+08	3.92257e+06	5879.12	359361	729971	186349	0	44729.4	2859.85	61611.3	19733.9	57548.5	5997	2.05585e+07	540403	85625.2	55360.7	0	5438.42	5332.93	81178.2	0
5-1_3	464.293	0	0	0	4.3182e+06	4.83556e+06	4839.11	0	1976.37	16096.5	218475	103543	106798	2920.69	1407.79	17508.9	1415.53	0	9219.1	1941.04	1.29268e+06	1.58245e+06	0	3.46288e+08	6.25155e+07	0	0	3.97326e+08	3.26729e+06	0	276967	493947	197474	0	6477.11	3495.4	29972	48772.9	28304	5452.89	2.10814e+07	486219	93728.7	101472	0	6211.45	1515.98	47878.8	0
5-2_1	5352.2	30649.7	8047.76	2519.16	6.49816e+06	6.64675e+06	4.31669e+08	3.09607e+07	13865.3	1.93391e+08	7.93901e+06	7.64439e+08	2.67898e+06	2.1307e+07	2.45169e+07	671510	2.09506e+06	19067.8	2.10062e+07	2.02628e+08	4.81002e+06	5.52606e+06	2251.64	3.0028e+08	8.94068e+07	24016.2	0	1.38476e+07	4.36957e+06	1.05221e+08	4.03447e+08	1.59932e+09	635558	1.38138e+07	3.30091e+08	3940.17	1.00416e+07	3.27639e+06	3.26259e+06	3.76296e+07	1.89884e+07	4.56403e+06	4.03086e+06	4.42682e+06	22908.2	3.43204e+06	392728	1.01336e+06	4.7056e+07
5-2_2	6846.18	11877.6	11465	3237.56	5.60369e+06	5.96452e+06	4.24902e+08	2.76698e+07	20094.7	1.17892e+08	6.25879e+06	7.51561e+08	3.08458e+06	1.21671e+08	1.53558e+07	642687	2.4283e+06	24211.1	2.03562e+07	2.16493e+08	5.96113e+06	5.23079e+06	0	1.27424e+08	8.99079e+07	35315.4	9513.01	3.71579e+08	5.216e+06	1.044e+08	4.08086e+08	1.79808e+09	552994	1.44874e+07	4.3289e+08	32361.8	5.35764e+07	3.58814e+06	3.91458e+06	3.64744e+07	2.13528e+07	5.31456e+06	4.73794e+06	5.12228e+06	73712.5	3.98286e+06	372720	992889	4.77373e+07
5-2_3	8557.8	22221.3	2549.47	5812	6.81912e+06	1.01039e+07	4.23683e+08	2.96462e+07	45285	1.18446e+08	8.7144e+06	7.74083e+08	3.26933e+06	2.2752e+07	1.53377e+07	668105	2.72549e+06	7166.58	2.09905e+07	1.99438e+08	5.81343e+06	5.59422e+06	1893.16	1.38249e+08	8.78451e+07	25663.1	0	2.41082e+08	4.8814e+06	1.01879e+08	4.61843e+08	1.16193e+09	515224	1.42407e+07	4.3402e+08	15863.5	5.87346e+07	3.80815e+06	9.8211e+06	3.02568e+07	2.26164e+07	5.46681e+06	5.23822e+06	9.6199e+06	88930.5	4.34806e+06	389159	1.07037e+06	4.869e+07
5-3_1	1.33355e+07	1.89379e+07	1.29451e+07	8.27299e+06	4.02944e+06	4.81004e+06	1.668e+06	154406	1.60814e+07	3.49753e+06	5.41348e+09	1.11824e+07	379111	1.40385e+06	458246	6.9651e+08	9585.59	3.55007e+07	37584.7	101899	1.3867e+06	1.84759e+06	7.85849e+06	2.17646e+08	3.55225e+08	2.87317e+07	1.03728e+08	1.61723e+08	3.60199e+06	761120	1.20147e+07	1.71513e+07	3.25652e+08	71094	2.27826e+06	1.51452e+07	246745	14260.2	246596	117534	2.12657e+07	288268	143220	157429	4.00508e+06	12675.1	4.29145e+08	2.75433e+08	609886
5-3_2	1.42833e+07	1.66589e+07	1.30688e+07	8.38008e+06	3.58659e+06	4.26555e+06	363786	2956.21	1.75555e+07	3.17642e+06	5.66984e+09	1.15807e+07	331544	1.40802e+06	455025	7.24743e+08	5370.22	3.6902e+07	7638.6	9173.43	1.44467e+06	1.82235e+06	7.51714e+06	1.70306e+08	3.20857e+08	2.75375e+07	1.03082e+08	2.34771e+08	3.46824e+06	310469	3.77051e+06	4.30877e+06	3.33342e+08	20707	522634	1.84864e+07	145278	2154.09	149034	23443.4	2.41592e+07	254609	92735.2	102140	3.69268e+06	11622.5	4.27678e+08	5.93717e+08	576536
5-3_3	1.32713e+07	1.76111e+07	1.28404e+07	8.06304e+06	3.4879e+06	4.14046e+06	248579	3769.57	1.60529e+07	5.52108e+06	5.50453e+09	1.09298e+07	338336	1.38039e+06	668652	7.07228e+08	6569.14	3.61529e+07	2427.13	6583.97	1.35646e+06	1.85889e+06	7.7802e+06	1.53196e+08	3.35642e+08	2.87076e+07	1.84108e+08	1.27556e+08	4.1249e+06	265207	3.29661e+06	2.42533e+06	2.97983e+08	7366.69	341544	1.16509e+07	165225	11636.6	171379	11985.4	2.30944e+07	223726	61103.6	69570.6	3.32137e+06	11145	4.32189e+08	4.88918e+08	558316
5-4_1	103264	331847	137734	87853.4	3.9674e+06	5.46527e+06	360398	2967.09	367905	905004	8.04293e+07	6.90747e+06	538640	774977	53803.3	1.13051e+07	23455.7	834541	13818.3	13267.5	1.5218e+06	2.03798e+06	82539.3	2.66348e+08	6.60063e+07	503412	869955	2.78364e+08	3.90742e+06	80036.9	1.19484e+06	4.24966e+06	1.33133e+06	4921.33	526606	151641	436171	84490.5	470592	30839.2	2.31906e+07	886353	399384	460465	1.04962e+06	33721.8	1.64599e+06	7.63234e+06	573878
5-4_2	7621.38	205158	41043.4	30742.8	4.24228e+06	5.30973e+06	339916	6636.68	128820	1.3106e+06	6.68635e+07	6.58922e+06	456218	843898	66693.6	9.60707e+06	34234.5	691229	14967.7	7740.85	1.51529e+06	2.18072e+06	23783.2	2.7257e+08	7.81754e+07	358259	695312	1.4713e+08	4.00088e+06	76541.1	1.42266e+06	3.96674e+06	726054	0	473970	54154.5	403294	73442.1	430725	33415.3	1.98192e+07	810971	401686	426668	911193	11204.6	527018	3.06492e+06	603392
5-4_3	6022.6	231412	36950.4	15424.3	3.96816e+06	4.53567e+06	336635	8595.28	94111.9	1.25814e+06	6.24656e+07	6.61491e+06	421420	805878	12853.8	8.7876e+06	35487.8	644144	12331.3	14842.1	1.51416e+06	2.01038e+06	28197.2	2.04202e+08	1.25226e+07	317666	608133	2.06451e+08	3.93779e+06	77641.6	1.24445e+06	3.47797e+06	715838	0	435690	39388.9	394685	58974.9	400089	19875.2	2.16699e+07	720080	383515	423198	868071	26607	455853	2.46616e+06	515068
5-5_1	565.661	79611.7	3630.83	11090.9	5.1121e+06	6.09137e+06	171561	4615.51	31345.3	846805	2.16952e+07	3.67451e+06	606997	419575	39456.4	3.43331e+06	14483.4	213759	9250.26	3484.15	2.20489e+06	2.56611e+06	4189.71	2.09351e+08	2.33553e+07	126218	174027	3.47148e+08	4.61943e+06	11086.2	730519	1.88317e+06	631944	0	227206	14206.3	681686	101389	697829	33409.4	2.39221e+07	760655	1.94618e+06	2.18806e+06	34690.6	8034.14	176423	1.0615e+06	181636
5-5_2	2515.62	75247.8	13815.8	7179.98	4.77187e+06	5.55547e+06	141337	1636.39	36087.6	977515	2.11526e+07	3.4714e+06	563846	422331	15499.1	3.39124e+06	15944.9	136636	15762.8	3434.5	1.96685e+06	2.67112e+06	4534.58	2.00036e+08	1.52597e+07	118142	144421	3.47687e+08	4.50588e+06	5978.73	503671	1.78357e+06	396989	0	211303	7905.44	575723	76285.9	586894	15888.9	2.18844e+07	624106	1.69946e+06	1.90411e+06	29440.1	5032.39	159881	1.3799e+06	188708
5-5_3	648.512	66593.5	4497.39	4754.42	5.31793e+06	6.14099e+06	154163	2211.81	21177.5	604965	2.12824e+07	3.47331e+06	549421	429801	12955.9	3.44271e+06	15637.6	229671	9408.56	2466.44	2.29704e+06	2.50125e+06	2270.33	2.69669e+08	8.03628e+07	111475	145016	2.46406e+08	4.3912e+06	12761.2	695826	1.70259e+06	440773	0	197500	7885.83	539081	85257	537695	11860.2	2.23227e+07	647188	1.25957e+06	1.39766e+06	24599.1	10702.2	173098	971043	170061
10-1_1	503.291	2413.35	0	0	4.67038e+06	5.109e+06	173479	0	3072.36	5502.61	1.3049e+06	435784	138497	25810.8	0	146361	2038.12	0	3775.29	3874.62	1.32123e+06	1.462e+06	1703.34	2.9511e+08	8.84609e+07	1463.16	0	3.58426e+08	3.39151e+06	49873.3	902202	1.96204e+06	264876	0	268733	4397.94	19455.5	2423.9	23733.3	4678.61	2.1267e+07	111789	70387	74132.1	475.382	4321.02	111626	263950	17226.7
10-1_2	607.904	2293.49	0	0	5.24067e+06	5.73694e+06	60973.1	0	2784.26	17308.2	1.3561e+06	454848	151798	14562.3	0	152011	2782.76	1727.51	3580.55	0	1.54404e+06	1.67121e+06	0	2.98899e+08	8.88415e+07	0	0	2.43683e+08	4.10824e+06	10508.6	592088	960341	439720	0	43384.8	4120.74	10153.6	1559.83	6889.26	5694.39	2.19579e+07	189222	81978.5	142254	0	2008.88	117531	289803	0
10-1_3	1044.16	0	0	0	5.25683e+06	5.80685e+06	21335.3	0	2488.05	26315.2	1.17229e+06	373769	146628	10603.5	0	123661	3171.23	0	8421.51	8180.82	1.59522e+06	1.68572e+06	0	2.89837e+08	8.50248e+07	0	0	3.27971e+08	4.11007e+06	3579.09	369973	720821	365784	0	24048.4	17293.1	20117.2	1383.64	15399.3	5250.86	2.00175e+07	96725.1	80274.2	87022.9	281.653	3683.49	94948.2	209105	0
10-2_1	702.523	0	0	0	4.80977e+06	4.46416e+06	13166	0	0	13928.1	276360	206849	161366	11433	0	14114.6	1284.6	0	0	2399.65	1.74017e+06	2.03857e+06	0	1.88433e+08	8.23723e+07	0	0	2.6334e+08	4.01557e+06	1675.46	351362	426798	194644	0	15475	5029.09	47556.6	9930.02	57352.9	4094.47	2.13923e+07	588368	23651.1	78984.9	413.5	5149.82	5032.29	47998	0
10-2_2	1057.66	0	0	0	3.84188e+06	4.35579e+06	10484.4	0	0	5207.76	245642	173119	126427	9030.47	0	8067.63	2753.83	0	2701	2173.02	1.65034e+06	1.91225e+06	0	3.28039e+08	7.96915e+07	0	0	3.91694e+08	3.9881e+06	0	135838	363119	219353	0	13103.9	16221.1	56736.6	6103.2	57396.5	9088.75	1.99753e+07	575414	80090.4	87467.9	396.558	4849.7	1725.24	39160	0
10-2_3	1120.09	0	0	0	4.56054e+06	5.04004e+06	8390.18	0	0	3962.53	261044	195863	61728.4	14355.6	0	23592.4	1370.21	0	2734.06	0	1.72366e+06	1.96395e+06	0	2.81475e+08	8.45189e+07	0	0	2.86405e+08	4.22553e+06	0	226050	367330	393539	0	3823.47	7905.69	39122.5	8026.47	61221.1	5202.13	2.02236e+07	635030	64631.7	68963.1	411.088	1853.67	829.86	65892.1	0
10-3_1	1552.09	4331.2	5075.43	2040.89	9.65166e+06	1.45088e+07	11006.6	70665	3995.53	3.19138e+06	2.71158e+06	7.11787e+08	7.10648e+06	4.28363e+07	212477	257573	7.03946e+06	2292.83	4.23714e+07	36423.2	4.88648e+06	9.13823e+06	0	1.04994e+08	8.13692e+07	5317	0	3.53101e+08	1.00651e+07	11392.1	359509	1.29366e+06	310202	0	184881	19208	1.74349e+07	975403	1.55065e+07	24781.6	1.99132e+07	1.22368e+07	2.26067e+07	2.59524e+07	143478	1.40349e+07	212288	563621	1.83637e+08
10-3_2	1819.38	2802.34	0	0	9.68712e+06	9.86033e+06	24924	50935.8	7533.26	3.00651e+06	3.54062e+06	7.35351e+08	6.19943e+06	1.46468e+08	193259	305627	5.97085e+06	3864.33	4.49911e+07	41895	5.03043e+06	7.86067e+06	1331.86	2.92198e+08	8.66022e+07	11577.3	0	2.97529e+08	9.13849e+06	24709.9	573089	1.34074e+06	474479	0	199350	20895.8	1.5064e+07	644591	1.45654e+07	3926.15	2.01501e+07	1.54662e+07	1.11927e+07	2.47684e+07	150988	1.23073e+07	217791	526251	1.85577e+08
10-3_3	927.493	5666.21	2246.84	0	7.92328e+06	9.02367e+06	16849.6	71688.7	12926.7	5.41784e+06	3.57744e+06	6.98174e+08	6.43681e+06	4.1919e+07	105223	276452	5.83893e+06	2960.31	4.34756e+07	55827.5	7.986e+06	3.39894e+06	2785.59	2.95721e+08	8.71203e+07	9233.04	0	1.15727e+08	1.07318e+07	19675	345920	1.19827e+06	359266	0	165448	5509.5	1.47594e+07	234525	1.09476e+07	9466.14	1.99476e+07	1.68151e+07	1.09663e+07	2.63555e+07	174495	1.21538e+07	199224	746164	1.8907e+08
10-4_1	567.408	41393.1	11151	1959.96	4.49929e+06	5.12432e+06	7.27969e+08	9.78803e+07	9462.87	9.79199e+08	9.41131e+06	5.32484e+07	2.05952e+06	6.9217e+06	6.70156e+07	438209	74520.1	2991.48	166634	4.36865e+07	1.52434e+06	1.93861e+06	1486.47	2.97867e+08	8.87725e+07	7199.27	0	2.36887e+08	4.30033e+06	1.81903e+08	9.473e+08	8.33706e+08	322096	2.82973e+07	7.25351e+08	3973.7	7.43631e+06	7.40054e+06	7.41626e+06	6.03667e+07	2.26843e+07	547925	113168	649717	5328.95	109858	41534.8	250746	4.31953e+06
10-4_2	913.337	4510.36	3131.92	0	4.30389e+06	5.02555e+06	7.25333e+08	1.03668e+08	5445	9.69034e+08	9.56167e+06	5.30742e+07	1.95637e+06	6.65399e+06	6.65802e+07	406690	54229.1	4647.49	56334.1	4.67867e+07	1.58669e+06	2.0461e+06	0	1.39634e+08	9.0701e+07	6746.8	0	1.48417e+07	4.57265e+06	1.68516e+08	7.752e+08	2.37397e+09	79463.9	2.84507e+07	7.25802e+08	10623.8	6.81928e+06	6.40401e+06	6.91143e+06	5.94652e+07	2.08146e+07	267424	415590	526641	4346.34	127679	50224.6	439479	4.06363e+06
10-4_3	512.71	6074.23	3157.88	2357.82	4.24734e+06	4.89391e+06	6.30272e+08	8.86973e+07	6420.31	8.18182e+08	3.64963e+06	4.43117e+07	1.83358e+06	5.7381e+06	5.45866e+07	323233	49607.1	1759.94	46114.3	3.53835e+07	1.69803e+06	1.79752e+06	2110.2	2.974e+08	8.80345e+07	3929.84	0	8.01137e+07	3.90086e+06	1.84979e+08	7.60577e+08	1.45387e+09	604832	2.32451e+07	6.3958e+08	3462.18	6.80376e+06	6.49015e+06	6.75338e+06	5.41634e+07	2.29298e+07	476358	431595	496423	3499.61	118056	61996.5	385425	3.40523e+06
10-5_1	1.69235e+07	2.09508e+07	4.16111e+06	1.57162e+06	4.12612e+06	4.60181e+06	2.6592e+06	264819	2.0512e+07	3.23187e+06	6.8332e+09	6.77307e+06	381735	858551	596292	8.45787e+08	21765.2	4.50137e+07	18615.3	105160	1.34428e+06	1.54921e+06	1.04135e+06	2.14033e+08	3.50293e+08	3.35178e+07	1.16147e+08	1.04062e+08	3.88611e+06	1.07574e+06	2.11798e+07	2.73653e+07	3.57602e+08	121057	3.62292e+06	1.47549e+07	39577.1	8120.81	115321	181411	2.11196e+07	156531	101358	133790	97676.3	30820.8	4.63126e+08	1.18823e+08	376494
10-5_2	1.60079e+07	2.02053e+07	4.56434e+06	1.32976e+06	4.41914e+06	4.07065e+06	535071	18426.7	2.02288e+07	4.37181e+06	6.70938e+09	6.66388e+06	363899	792972	336771	8.3005e+08	27346.3	4.1696e+07	9566.5	38437.5	1.30748e+06	1.5411e+06	935931	1.60836e+08	3.53253e+08	3.33768e+07	1.11472e+08	1.61011e+08	3.45434e+06	322957	4.43402e+06	6.8546e+06	2.99719e+08	33492.1	783689	1.30631e+07	92010.9	4052.01	91787.7	17216.4	2.42733e+07	84074.5	117271	72761.3	107850	7966.49	4.38851e+08	6.77047e+07	355754
10-5_3	1.77133e+07	1.63206e+07	3.60368e+06	1.00635e+06	4.26295e+06	4.92426e+06	275246	6106.63	1.49577e+07	3.75115e+06	5.30778e+09	5.47403e+06	376071	657044	281677	6.87333e+08	19066.7	3.47048e+07	22779.3	12490.3	1.27708e+06	1.50068e+06	332000	1.2612e+08	3.25398e+08	2.58955e+07	6.11136e+07	1.25039e+08	3.68306e+06	197935	2.99538e+06	3.16062e+06	2.92318e+08	7420.44	381338	1.57178e+07	96706.2	2540.94	96901.2	29555.7	2.18412e+07	194193	135511	149781	103586	18017.4	3.8277e+08	9.11709e+07	284228
10-6_1	3.58935e+06	75798.1	2.05357e+07	1.85367e+07	4.70676e+06	5.34046e+06	283357	8082.43	4.57413e+06	693249	1.99611e+07	2.60064e+06	240866	315671	31547.2	3.14617e+06	15203.7	204750	16636.1	2555.39	1.50176e+06	1.76705e+06	1.60696e+07	1.12034e+08	9.13072e+07	286574	430604	7.66698e+07	4.52276e+06	58652.5	1.79183e+06	3.09211e+06	8.55243e+07	0	351942	3.24863e+06	181163	8280.84	173485	37076	2.3666e+07	419338	66931.8	73753.2	9.33371e+06	4981.38	1.27876e+08	3.02495e+08	8.21154e+06
10-6_2	3.68731e+06	101509	2.02797e+07	1.90576e+07	3.55464e+06	4.1024e+06	230915	1615.76	4.34969e+06	498745	1.43056e+07	2.72279e+06	224586	284010	15548.5	1.74855e+06	8207.06	108907	13187.1	13883.6	1.43389e+06	1.80456e+06	1.62604e+07	1.13684e+08	9.04635e+07	223971	1.27369e+06	2.30973e+08	4.19535e+06	68637.1	1.11614e+06	3.00671e+06	9.54488e+07	0	341303	3.44405e+06	141671	5718	141544	26695.7	2.39683e+07	399695	88038.3	93976.1	8.84306e+06	17078.7	1.32159e+08	6.89259e+08	7.27248e+06
10-6_3	3.73623e+06	154859	2.07758e+07	1.7436e+07	3.62111e+06	4.23783e+06	224036	1435.46	4.48348e+06	456063	1.27546e+07	2.51677e+06	195990	308094	32137	1.57656e+06	11549.5	83945.4	16183.2	2401.11	1.48961e+06	1.88812e+06	1.61361e+07	2.10147e+08	3.38007e+08	237406	150033	3.33079e+08	3.94915e+06	33552.9	1.24409e+06	3.13548e+06	1.07211e+08	0	352883	3.46172e+06	165886	4038.2	168444	26431.7	2.19465e+07	327251	76359.6	83256.2	8.58301e+06	16921.6	1.24389e+08	3.77927e+08	7.12353e+06
10-7_1	7805.12	21065.8	228241	215770	4.0966e+06	4.73642e+06	141121	1634.11	118096	202849	1.17226e+07	1.97974e+06	430487	246820	18071.9	1.4704e+06	12532.4	88558.3	9520.81	2218.5	1.35467e+06	1.58755e+06	183636	2.19773e+08	1.96722e+07	36737.6	23610.8	2.70003e+08	3.93378e+06	24238.7	579030	1.90334e+06	397632	0	211302	40104.7	76831	4596.48	99416.1	31911.7	2.06497e+07	195672	121813	88758.9	24485	4671.35	404797	1.41656e+07	174184
10-7_2	665.383	28978.1	16163.8	17822.6	4.20683e+06	4.81465e+06	124749	0	44903.1	225779	1.17979e+07	2.14288e+06	475548	233116	8908.65	1.48081e+06	11756.6	97158.5	6004.52	3228.9	1.39248e+06	1.7701e+06	6566.1	2.55805e+08	5.75283e+07	45227.2	29270.2	2.79826e+08	3.80946e+06	25813.8	1.31038e+06	1.63777e+06	193865	0	169907	21865.3	100764	2860.57	100347	28043.4	2.08248e+07	193593	63950	69352.3	4676.48	4865.48	131549	1.99945e+06	146482
10-7_3	537.719	30002	16538.6	4350.93	3.68676e+06	4.98577e+06	131858	1581.31	27489.8	236678	1.19001e+07	2.05364e+06	441207	251404	6015.9	1.49922e+06	6547.17	88641.4	10647.9	2962.13	1.34979e+06	1.56343e+06	3835.29	1.9074e+08	5.58176e+07	44740.8	35944	2.75484e+08	4.16876e+06	13130.8	900412	1.83432e+06	603933	0	192569	8743.67	92971.4	1398.62	92989.4	27096.1	2.20305e+07	109336	158848	177291	9659.18	9131.94	108533	1.38803e+06	110021
10-8_1	503.076	82747.4	29336.2	20408.5	4.65495e+06	5.56842e+06	207678	7360.72	31096.7	578967	2.1261e+07	5.4427e+06	834721	699379	19895.3	3.50622e+06	14294.3	227091	5614.67	5849.4	1.67413e+06	1.93734e+06	15155	2.91162e+08	8.64609e+07	110636	162143	2.15656e+08	4.60506e+06	42218.7	862088	2.60949e+06	466180	0	300346	16153.4	185886	8796.28	185509	33378.4	2.10472e+07	1.19743e+06	378133	453778	383288	26520.1	262231	2.17468e+06	647372
10-8_2	650.748	65127.5	22408.1	16238.1	4.63631e+06	5.28416e+06	190716	2078.74	6581.25	621224	2.45122e+07	5.01223e+06	762891	632313	27436.3	3.08679e+06	12810.1	220290	13746.4	10512.1	1.61896e+06	1.73984e+06	12613.7	2.99158e+08	9.07098e+07	90348.8	126770	2.97584e+08	4.31118e+06	20206.8	925216	2.08289e+06	346077	0	265922	21542.5	187907	6683.77	184324	33868.6	2.01925e+07	1.06706e+06	348159	378795	339383	8587.81	246387	1.84071e+06	599172
10-8_3	568.559	77191.6	8258.29	6811.61	4.8771e+06	5.58617e+06	203497	0	16932.8	492361	2.46518e+07	4.81992e+06	717957	637884	39729.9	3.1524e+06	11043.5	207270	6712.34	15788.9	1.57893e+06	1.90609e+06	6942.86	2.98663e+08	8.95108e+07	113948	143666	3.51896e+08	4.19973e+06	30834.8	841557	2.2355e+06	573759	0	273177	23154.3	161974	14897.7	161145	11189.9	2.28092e+07	1.08346e+06	377142	416231	330669	17374.4	219868	1.77862e+06	575518
10-9_1	1167.17	83325.7	16545.8	14725	4.8834e+06	5.51779e+06	193833	575.39	20764	577788	2.32131e+07	4.78606e+06	726773	576860	46784.7	3.47773e+06	11959.2	242273	18536.6	7508.2	3.35144e+06	3.83341e+06	5861.83	1.80627e+08	2.86067e+07	149292	187535	2.58475e+08	3.72967e+06	9243.24	565430	1.94007e+06	762061	0	263108	14528	337255	9608.7	338943	35430.4	2.29882e+07	1.34485e+06	3.08438e+06	3.45893e+06	836.811	20523.6	224416	1.83458e+06	279460
10-9_2	709.477	68529.8	21529.4	10532.2	5.17819e+06	5.94578e+06	178878	2977.61	19629.9	601539	2.19062e+07	4.64717e+06	703332	562819	12981	3.42653e+06	5842.11	217725	26123	5334.99	3.3261e+06	3.71846e+06	6498.19	2.88285e+08	7.38069e+07	110043	163528	2.68657e+08	4.33378e+06	4975.31	478694	2.0886e+06	359119	0	258662	21172.2	328042	36534.4	333506	33770.4	2.1853e+07	1.30354e+06	2.89854e+06	3.23994e+06	724.59	13249.3	257559	1.75275e+06	284083
10-9_3	2774.55	84542.1	7129.11	3584.69	5.12346e+06	6.72595e+06	188810	3653.57	10386.7	433310	2.19592e+07	4.65079e+06	718161	569709	16511.3	3.62494e+06	9377.81	252339	12285.6	6234.14	3.29389e+06	3.83729e+06	4979.61	1.73127e+08	3.64725e+07	124298	168027	2.68467e+08	3.90322e+06	5875.61	642007	2.02607e+06	512251	0	237322	13519.4	326399	33687	329084	20695.4	2.11299e+07	1.33716e+06	2.89776e+06	3.29569e+06	601.537	25793.3	246730	2.00515e+06	275578
10-10_1	14070.3	22595.8	0	3070.63	4.15794e+06	4.85803e+06	13616.2	0	12140	320179	1.3869e+07	4.54857e+06	440521	539174	30256.4	1.67943e+06	18241	102149	149540	6219.46	1.41037e+06	1.74175e+06	0	2.79308e+08	8.32288e+07	10702.7	0	8.10753e+08	4.66178e+06	0	854408	774951	142711	0	98799.1	9797.58	373689	40230.3	383848	16278	2.04252e+07	108744	231392	221119	2525.23	17599.7	102143	998983	107616
10-10_2	2835.52	30872.3	2836.45	2985.52	3.52538e+06	4.06674e+06	24631.6	0	2451.51	262805	1.26895e+07	4.26058e+06	404946	521304	13267.5	1.58667e+06	23035.2	79473.5	107076	5730.4	1.44704e+06	1.91522e+06	2846.82	2.82946e+08	8.60234e+07	34599.3	0	5.48043e+08	4.58212e+06	2564.54	802572	708165	187578	0	93139.4	9094.05	345433	39658.2	344088	16106	1.94536e+07	146315	101538	225267	6111.55	8942.18	82007.1	908837	90507.9
10-10_3	3435.83	31454.1	5404.94	2693.37	4.53184e+06	5.26517e+06	42105.8	0	5322.95	324399	1.24195e+07	3.66326e+06	406711	465505	16144	1.60839e+06	9956.46	109741	84307.2	4929.13	1.38146e+06	1.6266e+06	0	2.89163e+08	8.83565e+07	43149.2	0	2.9242e+08	4.10882e+06	0	768466	687313	132782	0	87770.9	22050.2	350978	52557.9	353420	13257.5	2.15795e+07	183210	204685	271862	1423.18	14316.8	103547	864256	124773
enriched extract_1	1.10106e+07	1.17449e+07	7.73967e+06	5.01934e+06	4.48975e+06	4.80015e+06	1.07004e+08	7.94291e+06	1.42931e+07	1.0942e+07	3.59267e+09	2.31985e+07	628497	2.90542e+06	1.18187e+06	4.28606e+08	375038	2.00154e+07	2.60211e+06	3.77338e+06	2.0116e+06	2.13266e+06	4.37899e+06	1.9465e+08	3.16534e+08	1.52008e+07	3.32024e+07	1.38138e+08	3.85898e+06	1.99685e+07	1.51446e+08	5.95195e+08	2.02015e+08	2.84326e+06	7.3019e+07	1.03419e+07	2.03672e+06	378712	1.98676e+06	7.64531e+06	2.25683e+07	935793	825156	875640	63569.3	611644	2.67417e+08	3.03514e+08	6.17901e+06
enriched extract_2	1.05549e+07	1.07188e+07	7.13272e+06	4.71772e+06	4.04088e+06	4.34469e+06	5.3495e+07	7.02329e+06	1.28847e+07	9.53417e+06	3.01394e+09	2.17478e+07	603671	2.75955e+06	1.10653e+06	3.87843e+08	350303	1.98663e+07	2.48828e+06	3.45591e+06	1.85345e+06	2.06662e+06	4.11389e+06	1.46028e+08	3.17891e+08	1.36217e+07	2.9992e+07	1.29319e+08	3.47346e+06	1.83147e+07	6.54779e+07	4.64965e+08	2.04729e+08	2.56849e+06	6.67339e+07	9.77567e+06	1.43929e+06	359495	1.38757e+06	6.79323e+06	2.02584e+07	902253	811773	844749	57533.5	564542	2.59761e+08	3.2437e+08	5.77568e+06
enriched extract_3	1.11818e+07	1.18869e+07	7.26626e+06	4.716e+06	5.23581e+06	5.28168e+06	1.13223e+08	6.9451e+06	1.36341e+07	9.15669e+06	3.06576e+09	2.24505e+07	605105	2.7732e+06	1.1251e+06	3.9564e+08	351491	2.47776e+07	2.49145e+06	3.54298e+06	2.05318e+06	2.10867e+06	4.13664e+06	2.03614e+08	3.34584e+08	1.35809e+07	2.85348e+07	1.65534e+07	4.10217e+06	1.85702e+07	1.42958e+08	6.49852e+08	1.90334e+08	2.72309e+06	6.76782e+07	1.00056e+07	1.85969e+06	363903	1.75176e+06	6.90547e+06	2.18339e+07	837007	768630	832785	60016.2	523389	2.31132e+08	3.24334e+08	6.01433e+06
[truncated: 882 more columns]

## Sheet: Table S2B
	Table S2B. Full peak list of datasets analyzed at 0.01 mg/mL following MZMine processing and preliminary filtering completed in Excel (as listed in Materials and Methods). This peak list was imported into Sirius for additional data filtering (via hierarchical clustering analysis), data transformation, model simplification, and production of selectivity ratio models
	* samples are listed in column A, each analyzed in triplicate. m/z values and retention times are listed in each column of row 4, combined as "m/z / RT." Peak areas of each feature found in each sample are listed rows.
mz/RT	202.026/3.518	203.07/2.751	203.07/3.949	203.07/4.599	204.073/4.598	217.014/3.812	217.049/3.543	217.05/3.511	217.085/5.374	218.053/3.51	221.155/6.091	223.063/7.796	223.063/8.572	227.069/4.717	227.069/5.389	227.071/4.793	227.071/5.402	228.074/5.391	229.085/5.432	229.086/3.105	229.086/5.432	241.073/4.605	245.08/2.752	245.08/3.421	245.08/3.968	245.08/4.535	245.08/5.625	245.082/3.246	246.084/4.535	246.086/3.241	247.059/3.814	247.061/3.813	247.096/3.159	248.058/7.796	248.058/8.572	248.064/3.832	248.08/5.52	248.581/5.736	253.087/4.334	263.091/2.749	265.123/5.759	265.147/7.021	265.149/7.046	265.149/7.192	266.127/5.76	267.13/5.762	270.279/7.453	271.061/3.548	272.258/4.611
3-1_1	159678	4.69269e+06	201058	287412	22068.9	35072.2	2.01511e+06	1.88782e+06	224178	254408	9.60543e+06	3.46687e+06	2.09967e+06	25974.7	163410	28878.6	175701	2273.87	57191.9	1.90118e+06	61094.7	893246	2.30769e+06	6.22327e+06	428957	317112	33811.2	3.97969e+06	9481.4	612741	384905	388350	3.14181e+06	4.39079e+06	2.46854e+06	33430.1	8.12296e+06	696308	183218	1.0692e+07	1.05562e+06	3.40503e+07	1.1221e+08	2.94043e+07	160634	4434.68	2.02733e+07	5.70938e+06	2.57145e+06
3-1_2	88107.9	4.77951e+06	59642.5	292286	22446	11218.8	1.02421e+06	937654	398030	107783	9.67089e+06	4.71258e+06	4.15236e+06	25431.8	135687	27294.4	145387	7808.12	63220	1.88363e+06	71602.6	645056	2.47582e+06	6.18266e+06	269458	410740	25512.6	2.81633e+06	31825.9	419438	167966	174042	3.6145e+06	5.43945e+06	3.29256e+06	10743.9	3.47691e+06	181250	83746.5	1.10017e+07	424272	4.03747e+07	1.10145e+08	2.34919e+07	92321.7	2150.72	2.84669e+07	4.11989e+06	2.59143e+06
3-1_3	60252.2	4.59621e+06	104624	260574	24725.4	11582.2	767150	707489	217032	82173.7	9.30277e+06	5.51126e+06	4.29559e+06	3632.53	137909	24433.8	144472	6077.73	50154.8	1.87033e+06	57229	64117.3	2.48942e+06	6.23436e+06	262771	502253	10486.5	2.60597e+06	45153.3	388174	141939	140610	2.99941e+06	6.35666e+06	4.52393e+06	5242.04	2.11666e+06	175701	101879	1.06344e+07	405923	8.59754e+07	1.1282e+08	2.10774e+07	47281.3	1314.38	2.11026e+07	3.67549e+06	2.9858e+06
3-2_1	1.04124e+07	1.19436e+06	1.82267e+06	5.33557e+08	5.27379e+07	3.18579e+06	9.37325e+07	9.7115e+07	1.41155e+07	1.38465e+07	1.02322e+07	7.20839e+06	1.54191e+07	4.39445e+07	3.43079e+08	4.17645e+07	1.21406e+08	1.97632e+07	3.57153e+07	102029	5.48511e+07	520002	642148	807088	1.87213e+06	5.79267e+08	2.6442e+07	38780	1.64337e+08	909.427	1.9946e+07	1.97658e+07	967748	8.03561e+06	1.46913e+07	2.8322e+06	4.84722e+06	498111	3.11424e+06	2.76105e+06	4.79211e+08	1.07726e+08	1.09358e+08	5.50898e+07	9.00839e+07	5.52306e+06	2.46675e+07	283839	3.02976e+06
3-2_2	1.05542e+07	1.1843e+06	1.95857e+06	5.48425e+08	5.33397e+07	3.09353e+06	9.61646e+07	9.78159e+07	1.37198e+07	1.39335e+07	9.5619e+06	7.93609e+06	1.42557e+07	4.64082e+07	3.15647e+08	4.4256e+07	1.2025e+08	1.53429e+07	2.97189e+07	107184	6.26968e+07	445752	654354	854751	2.10523e+06	5.86612e+08	1.87172e+07	38133.1	1.64054e+08	0	1.91719e+07	1.93715e+07	936175	9.46787e+06	1.28112e+07	2.88507e+06	2.74077e+06	61602.5	3.4319e+06	2.81545e+06	5.32121e+08	1.11419e+08	1.13244e+08	1.32038e+08	1.00476e+08	7.01341e+06	1.85478e+07	265013	3.02941e+06
3-2_3	1.10764e+07	1.21487e+06	2.13905e+06	5.75701e+08	5.72538e+07	3.53105e+06	1.39376e+08	1.02397e+08	1.44999e+07	1.44766e+07	9.96935e+06	8.84881e+06	1.56545e+07	7.02197e+07	3.66276e+08	4.51614e+07	1.29106e+08	1.63442e+07	2.44092e+07	91947.3	6.8569e+07	247358	763307	1.25629e+06	2.32224e+06	6.38576e+08	2.97693e+07	21921.3	2.0732e+08	1075.5	2.05089e+07	1.5636e+07	983046	1.01304e+07	1.49961e+07	3.14661e+06	2.65981e+06	140771	3.29542e+06	2.9642e+06	5.15734e+08	1.12105e+08	1.14331e+08	5.34441e+07	9.68164e+07	6.14891e+06	2.58262e+07	264371	3.08614e+06
3-3_1	60745.7	284626	16482.9	3.69276e+06	427798	10825.8	732444	708410	317684	87803.6	9.05158e+06	1.0818e+06	2.22462e+06	88755.1	855737	302540	957172	126547	631128	10537.3	703350	51445.3	339907	201497	72450.8	2.40795e+06	197946	3778.97	328502	0	139997	143278	129219	1.15855e+06	357120	3058.04	840192	168413	1.88206e+06	628550	7.97813e+06	8.50214e+07	1.1597e+08	2.66221e+07	2.35736e+06	205885	1.36083e+07	65819.7	2.57113e+06
3-3_2	35481.8	260063	68946.6	2.34022e+06	279952	1907.38	363976	356095	298015	15480.7	3.87219e+06	907943	1.55616e+06	169903	367009	190748	394900	47422.2	229165	8880.11	260636	251272	286345	154526	68773.3	1.65233e+06	98785.1	1207.67	228152	0	49432.9	52316.2	126668	1.05638e+06	2.02635e+06	1957.35	943370	194885	1.78695e+06	547433	5.12719e+06	8.46158e+07	1.11096e+08	7.63444e+06	1.01576e+06	31618.7	1.83826e+07	126028	2.66238e+06
3-3_3	17624.7	251101	55711.5	2.36387e+06	266073	0	337176	323958	209197	38108.1	9.68106e+06	1.04583e+06	1.38346e+06	175707	336295	199436	366683	32557.2	176887	11627.4	200994	359013	276054	115679	51648.2	1.61318e+06	63859	1575.76	209892	0	19219.7	45400.9	126920	1.57676e+06	1.86843e+06	0	1.83009e+06	176673	1.68245e+06	578341	3.62738e+06	7.77556e+07	1.11586e+08	1.66632e+07	581442	39486.7	1.7836e+07	126992	2.92382e+06
5-1_1	119213	17667.3	14112.9	188397	13560.7	32545.5	1.56952e+06	1.31761e+06	179083	164876	9.76743e+06	582794	2.33537e+06	20984.6	125344	22903.5	136746	5443.92	57959.2	0	68363.2	203820	14055.2	6351.76	9350.07	314148	26929.9	2023.07	17256	0	275745	289679	0	662544	2.16981e+06	23264	1.1826e+06	71063.9	3640.72	24926.1	287044	9.17601e+07	1.14888e+08	6.80121e+06	19879.6	0	2.15449e+07	18669.1	2.8023e+06
5-1_2	34519.8	2582.52	10411.9	182265	10813.6	3015.81	497224	474516	168825	35068.2	9.59314e+06	737696	2.48046e+06	3196.56	127679	3686.37	143382	3138.81	67581.3	0	60957.3	259024	2763.78	2293.94	2784.08	314409	5863.35	860.009	19508.1	0	98890.4	102432	1766.37	891704	2.45416e+06	0	2.00359e+06	162392	1428.05	29904.6	298663	7.85267e+07	1.15855e+08	1.57202e+07	28617.3	0	2.01596e+07	16528.9	2.96128e+06
5-1_3	6905.26	2777.56	17607.4	176508	7203.01	1920.91	297074	281297	321294	15888	1.03478e+07	1.09719e+06	2.43584e+06	12824.3	120624	13717	135671	4549.63	60868.9	0	69074.1	46521.6	3005.4	3018.37	2260.43	401720	20264.4	954.961	41692.6	0	49412.4	49538.5	3477.05	1.19044e+06	2.70431e+06	0	2.30883e+06	78693.2	1588.39	22745.7	229458	6.88432e+07	1.10159e+08	2.65273e+07	19192	1982.99	1.98292e+07	17139.3	3.07023e+06
5-2_1	4.66245e+07	1.95986e+07	9.48257e+06	563854	61682.7	2.00002e+07	5.20494e+07	4.80034e+08	219420	5.62403e+07	9.81272e+06	1.69261e+07	1.52881e+07	171936	305717	82454.4	340441	30550.1	81437.8	5.54522e+06	112093	62115.3	1.04247e+07	1.01218e+07	9.31158e+06	1.35855e+06	193677	8.64686e+06	146800	1.29314e+06	1.02162e+08	9.63992e+07	9.46413e+06	1.924e+07	1.53148e+07	1.51722e+07	2.07752e+06	191895	4.66931e+06	3.91381e+07	2.65304e+06	8.76167e+07	1.07711e+08	1.96007e+07	510475	9178.99	1.6927e+07	5.30405e+06	3.01823e+06
5-2_2	4.27127e+07	1.79334e+07	1.51712e+07	619077	33609	1.78151e+07	1.18782e+08	4.42629e+08	172246	5.15912e+07	9.61536e+06	1.59931e+07	1.86116e+07	127642	247665	83728.8	273435	32758.5	89885.4	5.14588e+06	92196.1	279856	9.56977e+06	9.45553e+06	1.66836e+07	1.14237e+06	124896	7.24567e+06	106649	1.10696e+06	9.2496e+07	8.54586e+07	8.65323e+06	1.73658e+07	1.15121e+07	1.36027e+07	516181	37613.5	4.03455e+06	3.66797e+07	2.25564e+06	8.02434e+07	1.15318e+08	1.11013e+07	373524	27465.7	1.74205e+07	7.50428e+06	2.79176e+06
5-2_3	4.32453e+07	1.80876e+07	9.02212e+06	706111	58948.6	1.85826e+07	5.76855e+07	4.11174e+08	413227	5.24047e+07	3.74356e+06	1.65823e+07	1.45421e+07	157106	266180	86857.6	300637	19120.9	111359	5.19949e+06	124885	237937	9.54268e+06	1.95664e+07	8.74151e+06	1.05528e+06	124067	7.22099e+06	96288.3	1.06139e+06	9.36454e+07	8.72447e+07	8.57784e+06	1.79079e+07	1.35811e+07	1.4095e+07	1.46139e+06	163421	3.82702e+06	3.69655e+07	2.2282e+06	1.96344e+07	1.18913e+08	2.55554e+07	403442	22564.7	1.48652e+07	7.226e+06	3.11252e+06
5-3_1	174681	1.28069e+06	332533	7.06132e+08	6.73706e+07	78421	1.91323e+06	1.89227e+06	1.54448e+07	239299	9.56416e+06	1.69321e+06	2.98476e+06	5.68401e+07	1.47937e+08	5.73416e+07	8.81522e+08	1.98274e+07	7.4988e+07	68904	7.41339e+07	157204	856118	834947	508588	7.12919e+08	3.23354e+07	42253.1	1.93926e+08	1070.38	487550	520003	704318	2.27791e+06	3.1134e+06	59348.9	1.41827e+06	49031.2	6.21222e+06	3.02827e+06	6.36603e+08	1.16919e+08	4.75492e+07	8.10303e+07	1.20109e+08	8.97881e+06	1.43322e+07	399287	3.49356e+06
5-3_2	44153.7	1.24775e+06	336739	7.02267e+08	6.92056e+07	20865.3	560153	556902	1.6304e+07	27082	9.95786e+06	1.28858e+06	2.38308e+06	5.58174e+07	1.48657e+08	5.75461e+07	8.53945e+08	1.90608e+07	7.69849e+07	72156.9	6.75222e+07	63076.7	868148	909795	539532	7.76372e+08	3.16245e+07	24200.4	2.23093e+08	1445.74	204124	217529	681940	2.36405e+06	1.88732e+06	7994.16	1.04676e+06	118674	5.81504e+06	3.03875e+06	6.03932e+08	1.16395e+08	1.18121e+08	1.32255e+08	1.13394e+08	7.72743e+06	1.50143e+07	358100	3.29123e+06
5-3_3	25312.5	1.25961e+06	349847	7.04683e+08	6.82686e+07	21085.3	413150	406997	1.59542e+07	17912.3	1.03506e+07	1.29353e+06	2.36706e+06	1.46214e+07	1.51596e+08	5.60813e+07	3.29221e+08	2.02047e+07	6.81962e+07	78654.7	7.65911e+07	190541	873701	654653	540572	8.17385e+08	2.43108e+07	14578.1	1.83631e+08	808.375	191926	203846	652193	2.04093e+06	2.27464e+06	12860.7	1.4517e+06	223594	4.80541e+06	2.95901e+06	4.98513e+08	1.15597e+08	1.15132e+08	9.15986e+07	9.30859e+07	6.18719e+06	1.5262e+07	298932	3.26057e+06
5-4_1	57508.1	1.12774e+06	29416.8	1.22153e+07	1.51211e+06	6455.13	712293	705112	379670	92470.9	1.01736e+07	286202	757576	839099	1.19846e+06	979976	1.38008e+06	187980	961261	95788.7	1.14728e+06	196850	1.83728e+06	890558	346094	7.90518e+06	380641	45386.8	1.13087e+06	978.478	59260.5	64001.3	445044	397922	512004	2256.74	824303	368789	8.11371e+06	2.6069e+06	3.16517e+07	9.14291e+07	1.16769e+08	6.77477e+07	6.86044e+06	675824	1.92617e+07	439415	2.83294e+06
5-4_2	56026.1	1.12221e+06	107208	1.0595e+07	1.29346e+06	8295.55	698375	650492	446429	81208	1.0616e+07	296389	251098	684574	539977	771968	627477	72028.4	502149	85481.7	586165	146294	1.73369e+06	886820	205469	6.87711e+06	217078	27454.3	1.03079e+06	1848.66	88475.1	89107.2	462785	366982	182768	0	1.0317e+06	145855	4.64144e+06	2.67287e+06	2.52809e+07	1.15035e+08	1.15393e+08	1.3062e+08	5.83198e+06	510818	2.25369e+07	455012	3.28147e+06
5-4_3	54711	1.08372e+06	67669.3	9.92351e+06	1.25283e+06	2550.58	674719	640409	309270	62493.3	1.00461e+07	379781	231417	722471	507470	760220	559971	70329	351004	84482.9	406316	45779.1	1.69036e+06	718664	438007	6.65147e+06	232840	43225.3	1.00662e+06	0	83164.3	82214	430794	437921	151802	2136.24	858969	63345.9	8.07147e+06	2.52882e+06	2.30202e+07	8.23261e+07	1.12558e+08	7.0924e+07	5.31211e+06	415699	1.96645e+07	408339	3.02676e+06
5-5_1	16333.2	467062	67200	3.18573e+06	359797	1712.39	308005	295007	179080	26241.7	1.00581e+07	1.34301e+07	2.66244e+07	237143	206851	267436	234780	15932.5	163809	23339.1	184251	117542	753156	470200	74972.7	2.25031e+06	31116.6	5512.6	318227	0	26302.2	26083.2	192948	1.69515e+07	2.62856e+07	0	1.38357e+06	91873	453205	1.08602e+06	1.56635e+06	9.14485e+07	1.14315e+08	3.88987e+07	229520	5261.67	2.11652e+07	202100	3.18664e+06
5-5_2	12776.5	442307	42156.6	3.10715e+06	363723	0	283377	257074	173020	24694.9	9.91722e+06	1.41022e+07	1.9551e+07	50390	194879	261647	213976	6071.66	151138	15769.7	176621	128744	712368	423910	251854	2.13128e+06	61738.7	9724.47	299716	0	33164.2	34248.2	194376	1.48002e+07	1.82204e+07	0	1.5344e+06	180663	663385	1.03028e+06	1.53899e+06	8.88695e+07	1.14023e+08	1.53316e+07	280189	12733.2	1.47672e+07	286541	3.0351e+06
5-5_3	16606.6	441550	47550.6	3.16785e+06	382146	0	291550	285099	137801	21863	1.01094e+07	1.5308e+07	2.37589e+07	222080	186985	254821	208392	13023.6	161934	16095.1	184471	200734	737761	479516	218370	2.13502e+06	62803.8	9175.35	302128	0	21106.3	21828.1	202509	1.72805e+07	2.20264e+07	695.978	600393	246525	640472	1.02115e+06	1.44338e+06	8.88277e+07	1.15034e+08	3.55511e+07	250988	7323.06	1.53971e+07	273184	3.17859e+06
10-1_1	141108	55159.1	15238	244696	18821.3	51952.3	1.57863e+06	1.65437e+06	97475.2	204502	1.02825e+07	1.00382e+07	1.80031e+07	9430.41	136351	10621.4	154006	5451.32	33826.4	0	51668.2	71044.9	39221.7	11523.8	13880.8	1.45302e+06	29041.1	5687.64	173655	0	307531	346368	19072.1	1.13186e+07	1.71738e+07	31469.4	406724	74096.8	15441.3	131143	180599	8.7747e+07	1.1565e+08	2.32042e+07	7287.5	0	1.5854e+07	27582.1	2.16482e+07
10-1_2	30576.1	38835.5	5869.4	259772	21618.6	5546.93	577931	573525	436538	32394	9.84346e+06	9.84793e+06	2.12412e+07	4082.47	116836	14062.7	130202	6203.69	45924.7	0	49901.8	102225	23376.9	3230.49	4426.24	1.50621e+06	14892.3	1270.42	165043	0	82146.6	90052.7	10538.1	1.12291e+07	1.45934e+07	1369.83	670885	92119.2	5887.52	105780	190457	8.42681e+07	1.12792e+08	1.84847e+07	9408.64	0	1.59996e+07	18395.3	2.12442e+07
10-1_3	8600.75	42862.7	13137.9	266404	12031.1	1969.18	318528	326862	494846	26547.8	9.6229e+06	1.04519e+07	2.13746e+07	5162.9	121017	5606.29	136658	3525.39	39258.6	0	46160.7	210110	25185.3	12121.7	2560.1	1.50506e+06	22245.8	985.414	181704	0	56296.5	59673.3	20657.2	1.15871e+07	2.25131e+07	1731.46	996512	222600	5519.06	95447.5	156292	9.17355e+07	1.16831e+08	4.72684e+06	6861.24	0	1.83999e+07	6754.14	2.26448e+07
10-2_1	7454.32	20392.5	11898.2	227371	8031.62	0	222953	219065	120924	7860.9	1.00538e+07	5.95263e+06	1.17172e+07	7597.92	79163.8	8269.7	90531	2213.02	29966.5	1892.55	33793.5	90289.6	9111.75	2357.19	2548.62	1.18574e+06	4982.53	0	125426	0	26846	27111.4	41067.2	6.68484e+06	1.12655e+07	944.632	1.17325e+06	189432	1308.37	123410	173146	1.25934e+08	1.45996e+08	3.18382e+07	9085.31	0	1.78303e+07	21736.9	3.40262e+06
10-2_2	12194	21872.5	10141.8	191623	8711.06	0	166797	170352	36789.9	2486.41	9.85124e+06	4.79084e+06	1.22301e+07	2617.73	78830.6	6125.67	89027.8	0	29589	2334.04	34152.9	86145.6	17419.8	3372.68	2219.16	1.32405e+06	3212.96	810.514	143772	0	15139.5	16243.1	36969.6	6.33554e+06	1.1237e+07	0	514422	108146	850.878	116089	173626	1.02457e+08	1.34581e+08	1.06184e+08	19326	1119.4	1.35616e+07	11852.5	3.41154e+06
10-2_3	8348.59	16342.7	6475.86	223558	4958.19	0	135468	137678	176175	11685.4	1.01562e+07	6.87869e+06	1.40616e+07	6877.49	76306	8135.28	88931.9	4349.24	20709.5	1679.02	23588.6	68843.1	14476.1	2525.8	3477.22	1.29181e+06	5251.45	746.613	9470.86	0	13267.2	15602.6	34400.3	1.01677e+07	1.29665e+07	0	1.32483e+06	83212.6	1281.96	125441	185251	9.65461e+07	1.32683e+08	2.09119e+07	8740.96	1999.72	1.70976e+07	12388.1	3.0209e+06
10-3_1	2592.72	1.47788e+08	301713	540016	26709.2	3561.25	231728	251574	183352	19061.1	9.71509e+06	7.04459e+06	1.58733e+07	78272.6	227932	92539.3	259077	17531.4	88368.5	2.34313e+07	109678	166814	1.58084e+08	4.10295e+07	1.49273e+06	535097	21900.5	4.90904e+07	63173.9	4.39742e+06	45141.5	46180.2	3.14711e+07	7.87553e+06	1.83347e+07	0	942358	53439.1	2.26869e+06	1.35091e+08	680578	1.01738e+08	1.11157e+08	2.50996e+07	115146	1617.28	1.55557e+07	136494	3.19128e+06
10-3_2	6037.44	1.33365e+08	113772	482364	43565.2	0	162357	216649	315265	12199.4	3.94419e+06	6.60838e+06	1.336e+07	36322.8	237450	43557.1	263733	18985.6	94993.1	2.06706e+07	108961	258227	1.5966e+08	3.69358e+07	1.32833e+06	585585	41651.6	3.33733e+07	35283.5	5.53667e+06	37770.4	24184.2	2.95116e+07	6.55874e+06	1.48873e+07	0	211734	146603	1.59063e+06	1.17194e+08	380937	9.44887e+07	1.16062e+08	2.67273e+07	67269.1	1208.14	1.64474e+07	111045	3.17026e+06
10-3_3	0	4.6454e+07	72350.7	454401	33045.7	0	152667	213348	176398	16976.5	1.01336e+07	5.79514e+06	1.40237e+07	48858.9	209845	57435.8	241041	8458.06	89098.1	1.48004e+07	103895	133459	1.53794e+08	3.63529e+07	1.26342e+06	853503	53789.9	2.43953e+07	63386.3	4.19339e+06	12043.1	12412.4	2.8902e+07	6.95816e+06	1.32326e+07	0	1.71739e+06	70403	1.21118e+06	1.15185e+08	386683	8.46762e+07	1.22287e+08	9.6385e+07	78166.3	0	1.40151e+07	65174.6	3.18894e+06
10-4_1	1.54736e+08	5.79826e+06	2.95975e+07	611732	29712.1	4.30728e+07	8.81902e+08	1.05966e+09	344287	1.59993e+08	1.03587e+07	1.60777e+07	2.04179e+07	350821	129716	53759.2	152100	2001.17	26540.9	455576	29093.3	115403	3.11039e+06	2.05379e+07	2.73365e+07	2.46549e+06	289836	272661	226042	28695.5	2.1219e+08	2.16463e+08	3.76665e+06	1.76584e+07	1.99346e+07	2.65937e+07	1.94368e+06	238472	9.93589e+06	1.40277e+07	5.02681e+06	9.02409e+07	1.19046e+08	1.01438e+07	1.02879e+06	69954.5	1.60729e+07	2.11201e+07	3.06526e+06
10-4_2	1.42597e+08	5.34835e+06	2.81902e+07	730911	51894.7	3.33664e+07	8.91573e+07	9.81115e+08	97477.6	1.45263e+08	3.92392e+06	1.59351e+07	1.82579e+07	403494	117009	125391	134414	2051.01	61599.8	436263	71679.2	104039	2.82944e+06	1.91997e+07	2.56394e+07	1.86419e+06	249187	187154	229985	13444.1	2.0162e+08	2.01327e+08	3.66097e+06	1.77283e+07	1.69981e+07	2.50238e+07	1.20698e+06	145507	9.05018e+06	1.27004e+07	4.74988e+06	9.67786e+07	1.19714e+08	2.26474e+07	932351	53483.4	1.36766e+07	1.8269e+07	3.40189e+06
10-4_3	1.49743e+08	5.0355e+06	2.62177e+07	611907	41848	3.92907e+07	9.82006e+07	8.87182e+08	85020.5	1.05654e+08	9.43023e+06	1.46603e+07	1.70721e+07	402636	85647.9	67254.9	160415	2244.5	20892	401294	25550	174129	2.88764e+06	1.87458e+07	2.42372e+07	2.19618e+06	283476	183501	206150	11220.2	1.96152e+08	1.99211e+08	3.48825e+06	1.78257e+07	1.5973e+07	2.31271e+07	745145	112863	8.97315e+06	1.23617e+07	4.82945e+06	8.15212e+07	1.17797e+08	9.33688e+06	925135	48612.2	2.38962e+07	1.80772e+07	3.23497e+06
10-5_1	323427	773800	596196	9.92285e+08	9.65086e+07	123061	3.43049e+06	3.51109e+06	1.50926e+07	437220	9.9829e+06	2.90602e+06	3.37621e+06	7.57304e+07	1.8664e+08	7.70247e+07	4.42975e+08	2.61081e+07	1.68692e+07	29663.7	1.79289e+07	74811.2	443492	629544	814453	9.96834e+08	1.45005e+07	13576	2.10263e+08	813.188	815897	877201	336403	4.0475e+06	654432	115675	554722	102403	7.78935e+06	1.86578e+06	7.19643e+08	4.41956e+06	8.14186e+07	9.67718e+07	1.35241e+08	1.43654e+07	1.29053e+07	335523	3.54919e+06
10-5_2	77527.4	755772	290474	9.754e+08	9.55326e+07	43200.9	816312	811223	1.98446e+07	112745	3.98155e+06	1.55433e+06	667047	7.55129e+07	1.89546e+08	1.58966e+08	1.97569e+08	2.51683e+07	1.73904e+07	17594	1.86194e+07	167414	458644	757642	833608	9.91559e+08	1.90343e+07	10851.2	1.99697e+08	799.221	282771	303629	354660	2.06707e+06	1.25183e+06	39961.4	1.08324e+06	151661	7.09969e+06	1.87126e+06	6.34784e+08	1.19092e+08	1.44733e+08	9.34228e+07	1.19473e+08	1.25387e+07	1.8769e+07	214700	3.39353e+06
10-5_3	33811.6	780626	332929	9.65491e+08	9.44298e+07	10779.7	675117	580002	2.00664e+07	66332.1	1.00706e+07	1.51742e+06	753931	1.53671e+07	1.84438e+08	8.44969e+07	3.49885e+08	2.46495e+07	1.6769e+07	31823.5	1.77264e+07	96635.9	459415	711982	428400	9.45353e+08	1.77895e+07	12564.5	2.16987e+08	0	210208	221688	357387	2.10198e+06	1.24776e+06	20765.3	780024	63518.7	6.41626e+06	1.83521e+06	6.22496e+08	7.50351e+06	7.64603e+07	9.41003e+07	1.17999e+08	8.21826e+06	1.94753e+07	192160	3.64452e+06
10-6_1	8273.29	189696	34278	3.23787e+06	383324	0	366629	371720	2.0264e+06	26705.3	1.08105e+07	391298	1.47899e+06	444674	1.68977e+07	559580	6.4728e+07	2.6764e+06	1.08975e+08	474957	1.24759e+08	35606.6	1.32341e+06	1.82686e+06	165040	2.13064e+06	8.36744e+07	1055.02	328625	0	43167	27730.3	2.45495e+06	632985	2.02269e+06	0	673552	111642	364214	415663	2.46634e+07	8.32943e+07	1.16954e+08	2.31225e+07	5.62168e+06	431012	1.9062e+07	77448	3.23845e+06
10-6_2	11587.8	167282	18183	1.15863e+06	128819	0	277977	265740	1.48314e+06	17248.7	9.7791e+06	470430	1.76308e+06	237220	1.49313e+07	270329	2.29865e+07	2.27719e+06	1.20874e+08	439754	1.20306e+08	83358	1.15121e+06	1.66023e+06	199391	1.00047e+06	3.04692e+07	1682.96	129427	0	44648.9	40042.2	2.39672e+06	774308	1.82093e+06	0	948878	148782	1.07925e+06	405728	3.99871e+07	1.20954e+08	1.24615e+08	9.88781e+07	8.52666e+06	854241	1.7063e+07	190454	3.24522e+06
10-6_3	8878.3	138533	19884.2	747041	81930.3	0	249929	219522	1.60348e+06	22399.5	4.00777e+06	434975	1.77494e+06	179367	1.20561e+07	204566	2.35813e+07	1.91015e+06	9.57446e+07	363861	9.60015e+07	98618.7	937326	1.44801e+06	188161	639774	2.29233e+07	2081.38	30572.3	0	26355.2	25232.3	1.88892e+06	468006	1.68132e+06	0	2.24486e+06	115331	1.00094e+06	326524	3.66195e+07	6.08734e+06	1.2489e+08	2.50613e+07	8.04853e+06	780188	2.21152e+07	167107	3.01165e+06
10-7_1	20495.1	245857	47795.1	1.45382e+06	181893	0	287324	269088	194822	25494.3	1.015e+07	915544	1.89107e+06	30095.3	226268	139447	252713	17082.5	925074	4807.37	1.15309e+06	49441.1	180864	178868	25324.7	1.0809e+06	260225	8747.68	141350	0	22554	22626.6	102249	1.08262e+06	2.02439e+06	0	2.76576e+06	54199.5	1.23364e+06	568088	2.14382e+06	1.07012e+08	1.19517e+08	2.46851e+07	409280	3840.35	2.19832e+07	46738.8	3.11516e+06
10-7_2	13933.2	222955	26851.5	1.4347e+06	160464	0	272518	267923	472958	20511.8	3.90769e+06	1.04116e+06	1.71056e+06	106535	138325	120345	163270	8242.37	247852	3549.43	272368	33144	183596	79909.1	12714.1	1.04713e+06	109338	2387.46	127705	0	32244	31797.8	108350	1.21891e+06	1.71368e+06	0	1.42714e+06	60773	1.15765e+06	523598	1.39961e+06	1.03868e+08	1.21865e+08	3.84743e+07	328642	8331.54	1.51023e+07	52723.9	3.24739e+06
10-7_3	9057.66	200403	41501.4	1.22361e+06	146789	0	240844	208145	222094	18815.2	1.00262e+07	878487	1.67807e+06	95907	142000	104791	156087	2571.68	200541	2155.63	227072	118849	170143	117783	8797.54	887824	74461	3480.69	115603	0	23309.3	12707.3	95404.8	1.01889e+06	2.1564e+06	0	1.03645e+06	101609	1.05753e+06	470471	1.28463e+06	9.49288e+07	1.21225e+08	3.40556e+07	190537	6660.33	1.94871e+07	38636.2	3.02e+06
10-8_1	16622.2	563929	61874.5	2.95754e+06	332132	0	345752	285742	270799	33096.9	9.33432e+06	3.07237e+06	1.16104e+07	221432	228406	244655	253138	19653.2	226828	57779.8	255367	122333	932322	590705	142554	2.21836e+06	104834	7980.71	282034	0	44426.3	42784.5	262199	3.35678e+06	1.20937e+07	0	550625	102958	1.60672e+06	1.34819e+06	6.70755e+06	8.30642e+07	1.16624e+08	3.77093e+07	2.19157e+06	195767	1.95472e+07	249261	2.93968e+06
10-8_2	12505.3	556566	71573.9	2.84447e+06	330201	0	284310	277452	440725	16090.5	9.52254e+06	3.22718e+06	1.18247e+07	74372.2	230080	234555	264762	10184.1	182183	63710.4	212105	80312.5	865932	499517	94994.1	1.95605e+06	103196	8309.05	260944	772.721	24316.9	24035.3	237893	3.84311e+06	9.32601e+06	0	632789	174304	1.51195e+06	1.32219e+06	6.0014e+06	1.17153e+08	1.18658e+08	4.50723e+07	2.13959e+06	178434	2.16522e+07	223044	3.20614e+06
10-8_3	12501	485481	27915.7	2.5434e+06	288417	0	261958	255811	360412	22083.3	9.81654e+06	3.09945e+06	1.01886e+07	150932	197665	170659	217863	11451.8	173475	51171.1	200633	65293.9	781156	413654	125190	1.73072e+06	84333.3	8261.67	233079	0	37808.2	38069.5	221385	3.52448e+06	9.27159e+06	0	185082	148149	1.39583e+06	1.1255e+06	4.91225e+06	6.36637e+06	1.20469e+08	1.8797e+07	1.90956e+06	148035	2.10479e+07	198894	3.29373e+06
10-9_1	5474.72	494348	55065.9	2.6795e+06	304785	0	275793	269773	255906	23222.1	9.47465e+06	3.73145e+06	6.7819e+06	229581	206771	261648	229587	18960.9	165760	17803.5	191715	35734.5	870205	450670	33183.5	1.8498e+06	75746.7	1763.46	263411	0	17596.2	16101.9	226250	4.54956e+06	6.64723e+06	0	722524	33463	204812	1.17967e+06	1.03445e+06	8.77986e+07	1.16108e+08	9.59792e+06	193238	3270.53	1.22719e+07	247906	3.02466e+06
10-9_2	13738.4	487204	38000.2	2.81014e+06	314891	1632.24	272538	266042	466831	20000.9	9.88122e+06	3.59605e+06	6.15485e+06	205109	224461	267929	252489	18958.3	183342	9784.66	215318	79824.8	871831	438679	157281	1.90122e+06	98854.6	10942.6	259264	0	17526	12364	204406	4.36239e+06	6.32492e+06	0	402859	227630	307580	1.20404e+06	1.81435e+06	8.03537e+07	1.07418e+08	1.01135e+07	344402	8519.85	1.63133e+07	404917	3.21109e+06
10-9_3	9542.05	370756	36570.8	2.03228e+06	235034	0	235386	223199	177154	9996.72	1.05573e+07	2.72104e+06	4.44443e+06	160087	170985	198411	189788	4400.99	128160	8210	147705	62412.4	646090	342483	39963.8	1.30967e+06	43767.3	10922.1	192555	0	8998.39	8416.2	161774	3.37121e+06	4.26315e+06	0	268790	82274.6	282895	903221	1.61957e+06	8.61342e+07	1.16722e+08	2.65924e+07	268404	18251.3	1.83715e+07	372503	3.07969e+06
10-10_1	2780.65	327506	43644.3	1.60354e+06	171284	0	150839	143121	468213	7216.23	1.00748e+07	5.87717e+06	1.87495e+07	135667	121091	153326	136004	7961.13	99088.5	15300.5	116035	109710	478509	342569	60073.8	1.10967e+06	19853.9	8043.79	151712	0	10957.9	10070.7	184922	7.25093e+06	1.83838e+07	0	550556	81718.3	264485	810979	479766	8.56295e+07	1.21014e+08	9.35863e+07	59784.6	2009.8	2.21583e+07	213828	3.27166e+06
10-10_2	4250.61	341234	40151.6	1.53725e+06	178702	0	155504	151344	235273	4868.18	9.10023e+06	6.60947e+06	1.7842e+07	123501	125966	139320	139472	5885.23	92408	13611.3	106279	245529	482531	93194.6	70356.6	1.09034e+06	48337.2	1500.15	145440	0	12507.4	11824.2	145419	7.24024e+06	1.70569e+07	0	1.50658e+06	140381	238323	796519	345404	1.08211e+08	1.17086e+08	8.72716e+07	82080	2465.4	1.68381e+07	187641	3.25111e+06
10-10_3	2348.32	315413	26445	1.59736e+06	175998	0	161621	181920	335606	4523.7	9.92223e+06	6.50409e+06	1.57712e+07	112293	125317	126817	139883	5312.8	97785.7	3929.48	111194	110886	474872	313798	57905.2	1.08499e+06	59913.4	7217.82	152131	0	8129.45	7735.05	152830	6.96095e+06	1.54945e+07	0	1.02071e+06	70811.8	279436	776756	266332	8.93224e+07	1.16191e+08	7.33169e+06	80284.5	1779.93	2.24527e+07	209632	3.24007e+06
enriched extract_1	1.25693e+07	1.01732e+07	4.43056e+06	1.04459e+09	1.14316e+08	2.17395e+06	2.65643e+08	2.08571e+08	3.11059e+07	2.95666e+07	6.62061e+06	1.19338e+07	1.16041e+07	1.26235e+07	5.92775e+08	7.2435e+07	2.43469e+08	4.11432e+07	1.14445e+08	1.87005e+06	1.09951e+08	1.45576e+08	3.70348e+06	8.41257e+06	2.64562e+06	1.18004e+09	5.63851e+07	5.3047e+06	7.49909e+07	790309	3.68979e+07	3.7121e+07	3.41455e+06	1.29617e+07	1.17836e+07	5.35186e+06	8.65497e+08	1.30255e+08	5.93156e+06	1.85556e+07	1.16358e+09	3.43483e+08	1.05707e+08	7.11698e+07	2.12939e+08	1.71234e+07	1.26817e+07	4.80817e+06	2.57714e+06
enriched extract_2	1.62123e+07	9.37119e+06	3.03644e+06	1.07191e+09	1.09892e+08	3.33142e+06	2.58519e+08	1.93958e+08	2.95168e+07	2.71627e+07	9.68452e+06	1.36506e+07	1.59993e+07	1.63738e+07	5.84523e+08	7.87902e+07	2.35788e+08	4.05666e+07	1.12524e+08	1.92352e+06	1.07569e+08	5.58959e+06	3.86055e+06	8.53564e+06	3.24101e+06	1.17216e+09	5.47311e+07	3.19724e+06	7.36006e+07	486679	3.0046e+07	3.81026e+07	3.38077e+06	1.50885e+07	1.48601e+07	5.45136e+06	5.74253e+06	388580	4.19649e+06	1.75278e+07	9.63873e+08	9.32162e+07	1.05581e+08	8.08428e+07	1.79255e+08	1.89409e+07	2.47644e+07	5.4907e+06	2.86182e+06
enriched extract_3	1.50027e+07	6.757e+06	4.00371e+06	8.3377e+08	8.70496e+07	3.42888e+06	2.06548e+08	1.56092e+08	1.99137e+07	2.22144e+07	9.76959e+06	2.60849e+08	2.58671e+07	7.25922e+07	4.89343e+08	6.75692e+07	1.89457e+08	2.56046e+07	7.7613e+07	1.60471e+06	1.34236e+07	1.29255e+06	2.97437e+06	6.72583e+06	4.69241e+06	9.11959e+08	4.73668e+07	3.10161e+06	1.95828e+08	456806	3.11077e+07	3.09372e+07	2.63074e+06	2.84449e+08	2.43172e+07	4.46024e+06	3.52477e+06	557565	4.05905e+06	1.38226e+07	1.00197e+09	1.20859e+08	1.08777e+08	5.89308e+06	1.87584e+08	1.97746e+07	2.54776e+07	4.96636e+06	3.00222e+06
[truncated: 418 more columns]

## Sheet: Table S2C
		Table S2C. Full peak list of datasets built using second-round fractions analyzed at 0.1 mg/mL following MZMine processing and preliminary filtering completed in Excel (as listed in Materials and Methods). This peak list was imported into Sirius for additional data filtering (via hierarchical clustering analysis), data transformation, model simplification, and production of selectivity ratio mode…
		* samples are listed in column A, each analyzed in triplicate. m/z values and retention times are listed in each column of row 4, combined as "m/z / RT." Peak areas of each feature found in each sample are listed rows.
	200.238/4.019	200.238/4.841	201.019/3.239	201.021/3.241	201.055/3.003	201.063/4.578	201.114/3.233	201.164/4.072	201.164/4.596	201.165/5.38	201.241/4.842	202.026/3.832	202.071/3.473	203.035/5.427	203.055/4.806	203.07/4.825	203.07/5.293	203.07/6.005	203.071/2.971	203.071/3.604	203.071/4.131	203.071/6.248	203.072/3.706	203.072/4.159	203.072/4.869	203.072/5.258	203.072/8.578	203.128/3.73	203.129/3.725	203.18/3.986	203.18/4.697	203.18/5.606	204.037/5.15	204.066/4.409	204.073/4.805	204.075/2.98	204.075/3.646	204.075/4.167	204.075/4.821	204.119/3.125	204.184/5.612	204.566/3.447	205.015/2.377	205.051/2.911	205.076/4.809	205.087/6.342	205.124/3.81	205.196/5.444	205.615/3.916
3-2-1_1	2380	203000	5880	2670	10600	2810	387000	17500	17900	10800	28100	0	2830	5930	2960	31500	3180	1570	123000	9200	3440	1090	10300	2870	35200	3470	29800	55000	54300	3870	2820	3850	0	3080	4450	14100	1810	3080	7170	0	0	0	182000	38200	1830	16200	16400	7350	2150
3-2-1_2	2020	244000	3120	2540	6640	2030	413000	20500	19200	9740	31900	0	4180	3450	10400	29700	4150	2060	115000	12300	2770	0	13300	3180	36800	6710	19300	47200	45500	2780	2940	3760	0	2340	2190	14900	1840	2470	3070	0	0	0	186000	50200	1870	16800	20400	7530	0
3-2-1_3	2470	200000	4430	2030	17500	2680	414000	17800	26100	13100	30100	0	1720	3430	3720	29900	2970	1710	143000	15500	2380	879	15000	2180	33800	3460	26900	46400	44200	3040	2970	2730	0	2790	3830	6800	1510	2120	6020	0	0	0	173000	38200	2270	14100	13600	6810	1920
3-2-2_1	0	221000	183000	174000	12600000	2710	17800000	59000	16900	21700	26000	0	16500	4090	4150	255000	32300	12400	44900000	390000000	426000	14900	1190000	431000	321000	40000	44500	165000	150000	11600	5190	9290	0	1870	37200	42000000	479000	62600	37200	0	0	0	74300000	12600000	3180	19100	65400	7400	5700
3-2-2_2	0	186000	98800	98300	8060000	1460	1270000	29100	6320	16200	26700	0	13600	8230	6900	137000	15600	8380	27400000	217000000	214000	8830	44300000	204000	164000	18300	29800	99700	99700	5820	4360	6170	0	1600	12800	23000000	149000	28900	19600	0	0	2770	29900000	1320000	1500	68700	35100	8000	5450
3-2-2_3	0	173000	100000	103000	1260000	0	1150000	28400	8480	13200	24300	0	9480	3450	2220	114000	12600	8410	27400000	206000000	192000	8670	42900000	192000	133000	16800	33000	80600	80600	5860	3340	6260	0	1690	11300	21400000	149000	27200	17200	0	0	0	27500000	1220000	0	40800	38000	6860	2260
3-2-3_1	0	234000	571000	533000	733000	3650	840000	272000	28300	18600	32200	0	17400000	3140	2400	75200	19900	8070	909000	76800000	122000	11300	154000000	146000	84500	26600	32500	5640000	38200000	45400	41500	8230	0	1720	8660	126000	10900000	17600	13200	784	0	2140000	998000	106000	0	12600000	345000	7820	48100
3-2-3_2	0	206000	295000	285000	380000	3450	541000	148000	11700	14500	29200	0	13200000	3730	2760	52700	14100	3440	400000	48400000	57800	5850	71400000	62100	63300	13500	35200	2510000	12400000	24000	31500	3710	0	0	4410	54100	1030000	9010	7190	0	0	1570000	506000	54100	1590	142000	152000	6340	11100
3-2-3_3	0	188000	261000	254000	356000	1810	560000	98800	13400	10900	29000	0	13100000	3580	2910	51100	10600	2540	372000	15000000	69600	3940	77900000	61500	62900	13300	48700	2290000	11800000	23400	23600	7510	0	0	4980	52700	884000	7780	7790	631	0	10800000	452000	46500	2610	297000	184000	5750	24500
3-2-4_1	0	170000	3950000	18300000	142000	2490	736000	42000000	165000	72100	26200	0	92900	9000	1820	109000	38400	16200	757000	396000000	14700000	16600	297000000	9420000	131000	50700	52100	68500000	26300000	16500000	185000	303000	0	3760	13500	98400	63000000	1920000	14900	0	44100	439000	146000000	50600	2980	374000	10200000	5300	8230000
3-2-4_2	0	146000	2100000	2260000	79900	1860	548000	1990000	97700	42000	20600	1720	39200	8220	4430	72200	23800	8870	351000	222000000	7630000	8070	106000000	3740000	87300	29100	43000	36500000	10800000	1220000	95500	164000	0	2390	6610	49800	29100000	939000	10700	0	29900	278000	77700000	28300	1340	318000	1240000	5600	936000
3-2-4_3	0	151000	2240000	2310000	68600	2030	534000	14400000	95800	42700	23500	0	25300	10500	2480	68800	26200	11700	405000	227000000	8530000	10200	23500000	48500000	86200	30800	56100	38400000	11300000	1280000	103000	175000	0	1850	10300	49200	28900000	988000	12000	0	30500	290000	87200000	34000	0	294000	1300000	6670	1040000
3-2-5_1	0	142000	267000	280000	25800	2200	445000	345000	37600	21600	20300	51100000	14000	16600	2230	47700	13000	2830	154000	193000	27500000	2910	519000	2880000	54300	14800	39400	71000	71000	310000	76300	13200	0	4430	4370	22500	140000	454000	7320	0	1850	17900	314000	8160	2020	173000	64900	4050	8440
3-2-5_2	0	151000	294000	323000	21800	0	465000	370000	50600	23800	21400	54200000	6870	13800	2600	46800	13900	3140	176000	140000	21000000	3650	740000	3620000	57800	16700	39900	52200	52100	346000	70300	13800	0	0	6680	24200	29300	503000	7770	0	0	17100	204000	9610	2010	208000	83400	5600	0
3-2-5_3	0	174000	252000	273000	19100	0	447000	385000	42300	23100	18100	50700000	6760	13500	4420	54200	13900	5900	157000	156000	3430000	3190	477000	3350000	68100	19200	42700	44400	44400	324000	83600	13800	0	0	6360	21200	29400	473000	10200	0	0	12200	202000	9960	1890	229000	90000	7220	0
3-2-6_1	0	162000	1190000	1310000	56600	78800	624000	86800	1150000	24900	23600	272000	153000	7400	3720	25500000	42500	26100	369000	911000	274000000	30200	1090000	120000000	1790000	59200	70000	222000	223000	169000	23700000	40500	0	20400	2720000	53400	144000	55100000	3270000	0	8660	68100	157000	55300	273000	260000	21000	3760	122000
3-2-6_2	0	159000	1180000	1300000	39800	74100	578000	88900	1130000	25400	21700	162000	132000	6830	3410	25100000	51900	20200	325000	1030000	251000000	23100	1030000	223000000	1960000	63600	69900	191000	204000	160000	23400000	42800	0	24000	2700000	45500	124000	51900000	3150000	0	2410	51600	144000	62700	305000	284000	18200	5790	86100
3-2-6_3	0	169000	1100000	1210000	35300	103000	559000	85200	1310000	26700	20500	138000	123000	7040	2720	22900000	44400	24400	309000	890000	259000000	24500	941000	98100000	1590000	57400	119000	188000	211000	183000	22100000	31700	0	20500	2780000	45700	122000	31200000	3240000	0	2580	59900	149000	58800	198000	300000	16400	3320	86500
3-2-7_1	0	133000	82000	83900	58500	45500000	499000	11800	167000	31300	23700	12200	18300	3940	945000	1240000000	153000	73200	524000	283000	910000	79800	349000	971000	125000000	202000	212000	66200	65000	3500	442000	28700	0	1810	18700000	79800	43600	121000	202000000	0	2860	8890	50800	51100	1930000	327000	13600	5960	7470
3-2-7_2	2010	124000	74800	73600	54300	43000000	521000	5860	195000	21800	9900	7650	15300	4160	1040000	1320000000	144000	58200	473000	277000	848000	70100	310000	848000	94900000	160000	115000	64100	62100	3050	458000	31800	0	3280	17400000	70900	45000	118000	178000000	0	5510	10900	42100	40500	8270000	337000	13500	6600	6770
3-2-7_3	2650	125000	72400	74000	46500	43400000	478000	5390	284000	19700	15500	9750	13000	4240	1010000	1340000000	148000	66500	533000	301000	729000	76400	347000	901000	119000000	166000	207000	68800	67500	3010	438000	34500	0	2720	19400000	80400	43700	101000	202000000	0	2680	11000	40900	44600	11700000	343000	13800	7510	8090
3-2-8_1	0	118000	36000	36600	42600	1030000	461000	17400	127000	48700	0	1660	25900	8170	11600000	4040000000	653000	392000	433000	193000	724000	478000	310000	827000	174000000	946000	419000	104000	55500	2590	25000	15200	0	1970	48900000	56800	34100	114000	551000000	0	1840	8950	102000	10100	39500000	296000	9490	6410	3220
3-2-8_2	2120	105000	34500	34500	57700	910000	429000	18300	51000	52400	0	1750	31600	11700	1750000	4140000000	850000	488000	463000	216000	794000	565000	363000	891000	56300000	1030000	757000	56200	58000	2270	9280000	15400	0	854	49700000	67500	46200	132000	531000000	0	2010	8430	94300	10300	36000000	263000	10100	3820	2920
3-2-8_3	0	117000	35800	35800	46600	821000	435000	16100	51500	52900	0	0	26300	12500	2130000	4290000000	767000	446000	438000	215000	658000	545000	323000	699000	99600000	1010000	773000	56200	56200	2410	9140000	15800	0	1740	49200000	61500	39400	110000	571000000	0	0	8330	89800	9940	36100000	238000	10600	6330	2710
3-2-9_1	0	39800	12200	13000	72900	134000	458000	3550	2380	125000	0	1690	11500	9150	22400000	5600000000	2670000	24000000	580000	488000	945000	1350000	1420000	1090000	139000000	2970000	74200000	32700	32600	16600	7550	55100	0	4450	57200000	74000	66900	144000	759000000	0	4120	2200	22100	12400	53100000	239000	9040	8910	6260
3-2-9_2	1530	1930	13500	13500	73100	99300	445000	3240	2950	134000	0	0	7980	9210	3140000	5990000000	2680000	19900000	539000	471000	972000	1370000	1370000	1150000	88500000	2970000	44000000	30300	34900	17800	3190	60500	0	1360	66000000	71900	67200	158000	781000000	0	3070	1900	26300	10800	50800000	245000	10500	8660	2940
3-2-9_3	3990	1860	11400	13800	76700	114000	417000	3460	2050	122000	0	0	7380	16300	22500000	5350000000	2500000	20400000	572000	458000	968000	7630000	1270000	968000	139000000	2860000	65400000	27300	27200	12200	10600	42100	0	1670	66500000	76600	67200	132000	753000000	483	6520	2330	22900	10400	48300000	261000	11300	6530	4070
3-2-10_1	1720	124000	29300	30700	114000	9960	430000	48400	20000	380000	0	0	5120	21300	299000	1450000000	15000000	517000	888000	593000	486000	307000	664000	581000	57200000	25500000	293000	59500	63400	15800	58800	221000	0	1540	4260000	119000	81600	78300	192000000	0	41400	2650	34500	7940	10300000	198000	12500	286000	19200
3-2-10_2	3100	105000	25300	25300	92500	7290	426000	41300	16700	310000	13900	0	2190	22900	158000	1400000000	13500000	144000	762000	457000	345000	223000	513000	405000	27000000	26100000	86500	48400	50000	12500	40600	174000	0	0	2390000	105000	68100	50100	175000000	0	24300	0	33700	8710	221000	271000	12100	211000	13100
3-2-10_3	1710	149000	28000	28000	107000	9010	456000	39200	19500	265000	8910	0	5230	25000	130000	1360000000	14500000	136000	785000	495000	433000	186000	545000	517000	49700000	28400000	226000	52300	57400	12700	43700	215000	0	1770	2270000	113000	65900	66700	182000000	0	24100	0	32300	6280	9090000	238000	13000	236000	13300
3-2-11_1	0	139000	741000	851000	17600	882000	503000	14600	24200	243000	16200	2370	85000	31300000	2490	3240000	733000	554000	99700	170000	44600	406000	193000	52100	23000000	762000	71700	192000	192000	14100	133000	36300000	261000	0	354000	15900	26800	8250	443000	496	1120000	51200	62500	56000	32500	1130000	22400	13700	30300
3-2-11_2	0	113000	449000	470000	15800	679000	429000	13700	15200	168000	19700	0	54100	24000000	1800	1830000	545000	362000	53400	101000	23100	256000	107000	25100	2060000	577000	56000	137000	138000	9290	80000	23700000	209000	0	262000	6910	14100	7910	262000	0	609000	29800	48100	30600	16300	805000	16800	9790	17600
3-2-11_3	3600	119000	434000	475000	14400	639000	459000	8270	17700	145000	16900	0	35500	21500000	2810	1540000	493000	327000	50100	81800	22100	231000	90100	24300	1740000	493000	41000	116000	121000	8240	75400	20200000	200000	0	214000	7240	11800	3660	214000	0	496000	26100	41800	29000	18200	644000	15500	7590	13700
5-3-1_1	14400000	133000	12300	13600	21800	25800	477000	2340	2600	9320	19000	0	3820	28000	3620	117000	4080	2720	101000	13500	16700	3070	20800	18400	143000	6350	37800	61400	54200	15600	9270	6790	0	0	18500	9570	0	5960	18500	0	0	1790	121000	21200	0	350000	12200	5710	2990
5-3-1_2	2440000	128000	4420	3140	15100	18500	488000	1840	2140	9660	19800	0	2280	14100	1160	91200	3160	2740	88000	9580	10500	2040	15000	11500	105000	3250	37000	41000	36100	11200	5690	7200	0	0	12600	7250	0	2500	14700	0	0	0	70000	10700	0	346000	12100	7440	2130
5-3-1_3	2510000	143000	7370	4930	12800	15600	435000	0	1630	9230	18700	0	1590	15100	3300	87900	2990	2270	73600	10500	8870	2640	11200	9260	99200	3130	42000	42400	36700	10300	3630	7210	0	0	14100	8130	1750	3640	14100	0	0	0	73100	12000	13100	339000	9570	3830	2430
5-3-2_1	23200000	810000	56800000	8040000	12400000	1350000	23000000	21200000	650000	25500	101000	39000	10400000	14900	10100	1550000	96400	39500	275000000	413000000	360000000	39600	22300000	12500000	1780000	106000	80500	43900000	56000000	536000	684000	12300	0	66500	192000	29600000	55700000	28800000	232000	0	1390	1390000	15400000	1440000	16700	379000	637000	4880	1100000
5-3-2_2	11200000	755000	24400000	5070000	1540000	1080000	2120000	1470000	340000	18700	103000	20900	1350000	11800	3890	627000	53900	21600	161000000	234000000	154000000	19700	21700000	11100000	800000	57100	264000	21700000	24100000	237000	323000	10000	0	48700	66700	12400000	20900000	8450000	95100	0	0	902000	1610000	694000	10000	325000	335000	4300	852000
5-3-2_3	2030000	698000	4480000	4330000	1210000	824000	1740000	1280000	303000	17000	98300	14100	1290000	9270	2230	503000	38300	16200	135000000	187000000	111000000	15200	29900000	9670000	646000	46000	42400	15400000	17300000	206000	274000	7410	0	36900	78700	12000000	14800000	1340000	82400	0	0	820000	1240000	584000	2370	287000	317000	4380	760000
5-3-3_1	1390000	113000000	473000	462000	37600	25800000	531000	37100	1330000	19900	11700000	6470	51700	14000	65500	572000000	82500	41700	276000	222000	1110000	40300	226000	1580000	14400000	103000	90100	294000	296000	8170	18000000	15600	0	17400000	5520000	35300	33100	140000	67400000	0	2090	36900	172000	232000	278000	372000	66000	6340	20200
5-3-3_2	1380000	78600000	434000	414000	31400	21600000	519000	40700	1320000	23500	1780000	3410	36900	12000	8380	555000000	74900	34400	223000	177000	1120000	37600	182000	1620000	42300000	115000	70000	251000	252000	7950	16400000	15700	0	16400000	5510000	29800	29100	160000	61300000	0	1740	51400	156000	233000	280000	378000	64600	4260	18500
5-3-3_3	1460000	68600000	428000	411000	36300	22400000	521000	34800	1240000	20500	1620000	12400	39500	12400	13700	548000000	71300	37600	210000	176000	1150000	44600	167000	1460000	52500000	95300	93100	270000	275000	8090	17500000	16600	0	13300000	5880000	28300	21900	137000	64700000	0	1720	38600	162000	232000	274000	402000	70100	7240	16500
5-3-4_1	341000	1660000	32100	32100	63500	520000	467000	7160	38800	183000	216000	0	40200	14800	803000	6370000000	6030000	558000	510000	357000	263000	527000	291000	276000	29400000	8360000	868000	29100	29100	9300	85900	28800	0	16900	54100000	55900	54400	37500	201000000	0	2230	1320	929000	169000	47200000	289000	9480	16900	3490
5-3-4_2	315000	979000	26100	26100	58100	178000	425000	7220	30200	211000	0	0	44300	14500	2120000	6650000000	6470000	585000	505000	376000	253000	565000	285000	258000	22600000	9220000	1000000	60500	71200	9150	93700	33300	0	3280	57100000	56400	46800	32100	164000000	449	4200	1280	953000	160000	51100000	243000	8230	18100	3610
5-3-4_3	309000	331000	26600	26600	50000	80100	436000	10400	51300	184000	0	0	53200	20400	3120000	6690000000	7520000	613000	511000	354000	281000	553000	303000	280000	25500000	13100000	857000	26900	26900	9120	72700	26000	0	2150	99000000	69500	50200	40900	508000000	471	0	2460	981000	184000	51500000	271000	7580	15500	2920
5-3-5_1	15700000	737000	189000	193000	41900	657000	516000	248000	176000	13200000	105000	0	23500	163000000	141000	139000000	36500000	67600	236000	136000	88700	44000	103000	79200	23000000	3090000	51000	103000	106000	80100	121000	132000000	14900000	7240	2800000	30000	15200	10500	18300000	507	9050000	13200	395000	1200000	252000	244000	15300	2550000	15300
5-3-5_2	15300000	556000	182000	184000	46500	616000	500000	249000	149000	14900000	82400	0	23700	169000000	65200	63700000	3070000	51200	220000	143000	76600	35100	96700	73500	19400000	13400000	63100	95000	103000	77000	119000	136000000	3150000	5220	1460000	32300	14900	9120	1680000	0	9460000	15800	382000	1070000	153000	243000	14600	11700000	14800
5-3-5_3	3300000	341000	160000	159000	47600	725000	531000	244000	153000	15100000	52000	0	22600	168000000	79100	57600000	2960000	56600	212000	119000	69500	36000	93300	63800	24500000	3050000	67500	91300	97000	78600	100000	129000000	14100000	6470	1380000	35900	14300	11400	1600000	0	1880000	13800	363000	1120000	126000	248000	17000	11600000	20900
5-3-6_1	1820000	332000	230000	237000	25500	51000	545000	19600	55800	1240000	48100	0	26800	834000	22700	4380000	66900000	66600	88000	196000	24400	25600	192000	26900	4240000	5960000	45300	103000	105000	12000	75300	535000000	152000	3140	491000	14700	28100	8070	605000	676	83100000	4940	252000	85900	35800	378000	12800	44400	10800
5-3-6_2	1750000	267000	207000	211000	24600	34900	572000	23400	52000	1630000	44400	0	22800	759000	3740	4110000	53500000	81500	98600	175000	26300	25100	191000	28300	4070000	6380000	44300	110000	112000	12500	66500	551000000	46700	1860	487000	11500	22800	7360	612000	0	80800000	6520	285000	81600	51700	340000	13900	58500	12200
5-3-6_3	1660000	245000	194000	198000	30900	39400	544000	17600	48600	1300000	37600	0	19100	793000	1870	3870000	64100000	47800	99300	172000	27700	25500	181000	27400	3810000	5890000	47700	99300	105000	12800	67000	513000000	19500	2530	418000	13300	29600	5460	525000	0	71400000	7630	249000	81800	43600	412000	13900	54300	14300
5-3-7_1	607000	192000	901000	942000	10600	665000	455000	4760	5120	40600	27700	0	5750	46900000	3990	775000	543000	203000	27400	124000	7940	16600	125000	7680	795000	331000	37800	33200	36400	6120	13800	1170000	4630	5460	79400	5740	18600	3460	105000	506	31600	11800	30800	17700	7110	276000	8750	4440	5980
5-3-7_2	468000	182000	727000	747000	8110	614000	460000	3080	6120	35800	25500	0	5000	42400000	2390	583000	178000	241000	22900	95000	7690	13200	95600	7060	641000	182000	48500	47800	24900	5010	7720	1090000	2200	4280	59100	2360	14600	3160	82800	0	123000	11900	25500	13300	6310	233000	6940	4220	1990
5-3-7_3	435000	170000	718000	772000	13700	585000	450000	2770	5260	26900	24300	0	6380	41400000	2320	545000	172000	192000	24300	88600	7110	10100	89400	6420	613000	179000	33700	27700	27300	2820	10900	836000	2230	5580	61300	2370	13400	2840	76800	0	109000	10400	16800	8390	5080	249000	7520	4300	3660
5-3-8_1	1320000	156000	68400	69700	19000	51500	471000	2160	12100	11500	19900	0	8740	667000	2420	919000	31900	716000	74800	229000	16900	123000	236000	17200	1080000	31900	29900	67100	67700	6410	4690	16900	0	0	92400	8660	30700	5250	135000	0	0	7410	57400	1710000	8710	254000	9950	3890	15500
5-3-8_2	1400000	166000	76500	76500	15500	39200	496000	1770	11700	13000	23900	0	6520	312000	3460	882000	29800	809000	79000	230000	15200	139000	238000	15300	1060000	32400	34900	70300	73700	6470	7920	25700	0	1380	125000	12000	31900	2170	133000	0	0	8660	58100	1790000	9290	267000	8990	3750	14100
5-3-8_3	1470000	162000	70100	74200	12300	38400	458000	2570	13600	12400	20800	0	6180	218000	920	1010000	30600	839000	78400	215000	17100	144000	233000	18000	1150000	34100	36300	67400	71500	3230	5820	19800	0	0	104000	11900	28200	2440	149000	0	0	6610	62900	1920000	16400	302000	8620	6190	15700
5-3-9_1	17000000	176000	147000	152000	33700	94900	620000	127000	25900	27300	23900	0	49200	74900	2010	3430000	62800	985000	137000	69300	28400	1140000	71300	31900	17400000	62800	39200	204000	207000	31700	138000	160000	0	0	358000	16800	10700	5940	486000	0	22500	9140	151000	182000	36800	28400000	14300	11300	142000
5-3-9_2	17300000	171000	162000	167000	41700	83300	588000	117000	31100	26900	23200	0	49500	52900	28700	3530000	65900	1040000	137000	72500	25600	980000	68300	27700	17000000	65900	34000	197000	200000	31800	124000	167000	0	1880	371000	17800	9910	7740	477000	0	27100	6660	167000	170000	38200	29400000	17500	7210	133000
5-3-9_3	17600000	133000	156000	163000	37700	88500	599000	140000	28400	26900	20100	0	52700	61400	3320	3620000	61300	1180000	131000	82900	25900	1160000	88000	28400	17200000	71100	33000	204000	204000	30800	131000	173000	0	2200	376000	20400	10100	7040	483000	0	27300	8130	146000	176000	27700	30500000	13400	10100	160000
5-3-10_1	901000	235000	51200	53100	15600	103000	546000	2640	9660	12200	34700	0	6720	64400	2440	3220000	19300	136000	60600	22700	20400	266000	23300	16900	3270000	27500	29100	88700	91700	2230	3660	14200	0	0	351000	6710	2790	5000	450000	597	1430	1630	84600	14600	35600	403000	8750	3940	11100
5-3-10_2	847000	269000	60900	62700	11400	85600	514000	2480	10200	11900	38900	0	8990	46400	2900	3470000	20800	77100	59900	22600	16200	275000	23700	16600	3410000	24200	34000	92600	95600	2280	3420	12900	0	0	386000	9200	4790	5370	480000	0	1780	5410	82000	15200	30600	237000	8940	6560	10400
5-3-10_3	693000	224000	42300	44300	11200	72100	497000	2180	7090	10800	27500	0	6080	48300	2910	2840000	17800	46800	52700	19900	15600	219000	19900	16100	14200000	19400	37600	87000	85700	2130	4990	11400	0	0	313000	8870	3140	2910	406000	0	1550	2190	68800	14900	30000	245000	9080	6240	11900
10-5-1_1	2140000	3840000	4650000	24900000	923000	443000	2000000	553000	224000	21200	560000	0	43200	8960	5700	696000	26600	13900	70000000	12600000	7240000	14200	12800000	86600000	809000	36600	31200	1720000	1700000	473000	603000	9970	0	343000	109000	1350000	9630000	955000	109000	837	0	475000	665000	258000	8000	294000	206000	9120	429000
10-5-1_2	2020000	1790000	4590000	23000000	851000	321000	1160000	562000	240000	19700	253000	6720	26700	7100	4210	601000	27000	13800	64900000	81200000	30800000	13400	64000000	6210000	725000	33200	60800	1580000	1560000	453000	487000	9030	0	293000	92300	1260000	9060000	897000	92300	0	1640	363000	620000	281000	8750	305000	210000	3610	404000
10-5-1_3	2060000	1080000	4590000	22600000	791000	460000	1120000	598000	216000	18000	161000	4860	32900	8330	3010	688000	26900	13900	67100000	102000000	34400000	14500	11500000	70000000	821000	34200	37900	1600000	1580000	419000	542000	8230	0	277000	87100	1190000	8750000	862000	87100	0	0	326000	546000	286000	4620	298000	211000	6850	360000
10-5-2_1	847000	327000	361000	355000	25000	39200000	494000	61400	15200000	86800	50700	0	9320	7470	437000	791000000	72100	66800	184000	94500	863000	53300	104000	916000	32300000	94900	96100	71600	71400	7190	35300000	20300	0	150000	11300000	25800	15300	118000	98700000	0	2450	11300	154000	114000	214000	259000	67500	4060	10800
10-5-2_2	721000	203000	263000	256000	19500	38500000	472000	44700	12000000	66700	26200	0	8410	8360	345000	732000000	61000	51600	119000	52400	737000	47500	55700	698000	24100000	76400	89200	55300	59000	6880	30500000	19200	0	163000	10200000	17100	6410	97400	83200000	0	2380	6290	143000	88600	166000	219000	39400	3920	7380
10-5-2_3	656000	165000	238000	237000	22800	43000000	478000	44500	8040000	68600	25700	0	6630	7310	134000	692000000	54100	54800	118000	48300	668000	53400	49200	724000	26400000	73400	56900	54400	55800	6290	25600000	14700	0	168000	9470000	19400	9220	100000	80700000	0	2860	7810	132000	100000	256000	247000	45200	8430	8780
10-5-3_1	229000	0	58200	58000	39400	1460000	429000	20000	71800	210000	0	0	2400	12900	684000	6550000000	5090000	496000	286000	225000	198000	515000	176000	180000	382000000	24100000	911000	23600	23600	14600	69700	133000	0	4920	421000000	39000	31400	29400	276000000	431	25000	0	1480000	50500	50100000	213000	7170	19100	21900
10-5-3_2	213000	23400	52600	52600	34600	727000	428000	21400	140000	184000	0	0	2010	13900	2140000	6380000000	5180000	472000	296000	207000	212000	505000	175000	207000	372000000	8850000	898000	24900	26700	14100	102000	134000	0	1540	52900000	40600	26400	28300	692000000	580	18400	0	1500000	43500	46400000	211000	9800	16200	20300
10-5-3_3	226000	0	50900	50900	32200	587000	440000	18200	75400	169000	0	0	2140	10000	712000	6550000000	5010000	482000	304000	230000	189000	482000	175000	182000	418000000	18000000	830000	27400	42200	14500	93900	138000	0	3010	400000000	43000	28300	29900	36500000	470	24000	0	1570000	41700	51800000	223000	6900	20800	18700
10-5-4_1	1630000	142000	402000	385000	24600	343000	457000	1610000	79500	965000	3720	0	1920	66000000	2870	123000000	53800000	38900	94500	80100	37100	29300	75200	33200	15400000	7600000	107000	56500	59800	87800	142000	52800000	1250000	0	2130000	11900	11700	10500	11200000	591	759000	8150	356000	70300	165000	247000	12700	787000	13000
10-5-4_2	1760000	155000	426000	402000	27500	307000	461000	1360000	95200	988000	18400	0	1960	50100000	45800	72500000	2660000	48700	80500	76100	37600	21900	76100	31600	8990000	2200000	47300	65400	67100	86900	129000	53800000	1300000	0	1040000	11100	9080	7050	1080000	532	701000	9820	343000	71400	94100	282000	10100	817000	15300
10-5-4_3	1860000	145000	453000	406000	21200	321000	460000	1500000	103000	1000000	11800	1210	1820	55200000	5040	81600000	2630000	48500	102000	83600	38300	22700	72900	38300	9660000	2230000	63000	61700	63600	89400	145000	37900000	1510000	0	923000	11700	13100	8130	963000	582	734000	7600	354000	74400	85700	268000	11500	859000	13700
10-5-5_1	415000	145000	2230000	2050000	5440	254000	417000	5220	0	29800	17400	0	3320	15000000	3360	789000	239000	38800	17500	101000	8700	10400	101000	7490	795000	91300	28900	25600	25600	2640	3210	36100	97800	3620	89200	1810	13600	2820	116000	652	4040	1650	23800	6880	8100	262000	7030	7020	0
10-5-5_2	407000	137000	2320000	2100000	7560	209000	412000	1440	0	16700	20700	0	2900	61000000	4100	693000	130000	36000	22400	103000	7900	9650	103000	7900	679000	29000	20700	47200	53400	1450	2590	34600	15800	4130	68900	2070	13200	5390	87300	532	0	1320	22200	3200	3500	235000	8600	4860	2150
10-5-5_3	392000	134000	2200000	2070000	17100	250000	408000	1290	1750	12500	17900	0	2590	65200000	3530	666000	143000	40700	17500	104000	7470	8020	104000	6390	658000	117000	25500	21500	21500	1690	2930	14900	6280	3240	74100	2170	14400	4710	91000	570	0	0	22900	5410	7910	224000	6240	6160	2030
10-5-6_1	22300000	151000	109000	105000	27300	361000	555000	6250	4740	39000	21100	0	5710	1380000	2470	18200000	43900	456000	69400	53800	19000	242000	51500	19000	3460000	53900	30500	104000	108000	3530	10800	17400000	1790	0	419000	9070	5580	2910	502000	686	560000	1300	75200	560000	40900	299000	8310	7560	12800
10-5-6_2	27100000	147000	98900	92000	38600	383000	558000	6610	7260	38700	19600	0	11700	499000	3190	16500000	44900	381000	67900	46900	15700	231000	42200	15700	2940000	51800	25100	94500	88900	7220	9580	18700000	2070	1250	390000	9410	5680	6120	436000	649	621000	0	68700	600000	39800	301000	8200	7600	12800
10-5-6_3	26100000	161000	84100	79500	29400	379000	542000	7680	6900	36400	20900	0	2950	332000	2400	16800000	37700	433000	68600	46200	16800	279000	39600	15600	3120000	48600	30200	112000	114000	2940	12000	18200000	1700	0	390000	10500	7310	5870	447000	952	556000	2220	65700	519000	28900	290000	8440	6640	13300
10-5-7_1	149000	133000	83500	78300	10900	91600	465000	1830	5730	12900	16500	0	2540	84700	2720	40000000	30200	142000	44200	26600	21900	187000	25300	21900	6080000	42700	29100	84100	85100	2240	3590	25200	0	0	907000	4050	2710	2940	931000	24200000	2610	0	38500	27000	73000	222000	9790	8020	6540
10-5-7_2	83000	117000	80400	74600	16800	84100	477000	939	3510	10800	15900	0	4130	68600	2320	40400000	41600	116000	39900	30700	21800	197000	23100	15100	5800000	61000	42100	90000	91500	2110	7470	12100	0	0	787000	4900	3060	1430	845000	37700000	0	2540	34500	32900	64700	199000	6910	3830	10600
10-5-7_3	64000	131000	82800	79200	13700	83200	490000	981	6100	16200	16300	0	3350	51700	3720	39300000	35800	129000	42500	29800	21900	206000	29800	16600	5770000	42900	32200	83700	85300	2880	6440	10600	0	0	786000	2200	2920	2240	837000	37400000	0	0	37900	28000	76800	206000	9170	4100	11000
[truncated: 2,871 more columns]
